# Supplementary material for: Chesapeake Bay Dissolved Oxygen Criterion Attainment Deficit: Three Decades of Temporal and Spatial Patterns
Source: PubMed Central journal article supplement (PMC6750769; doi:10.3389/fmars.2018.00422), 2018

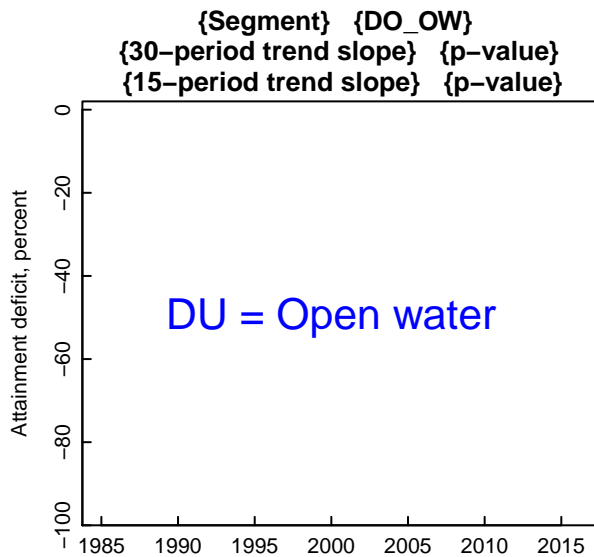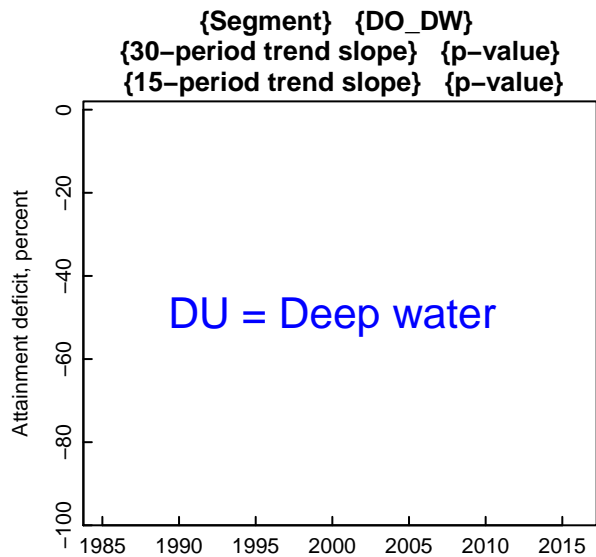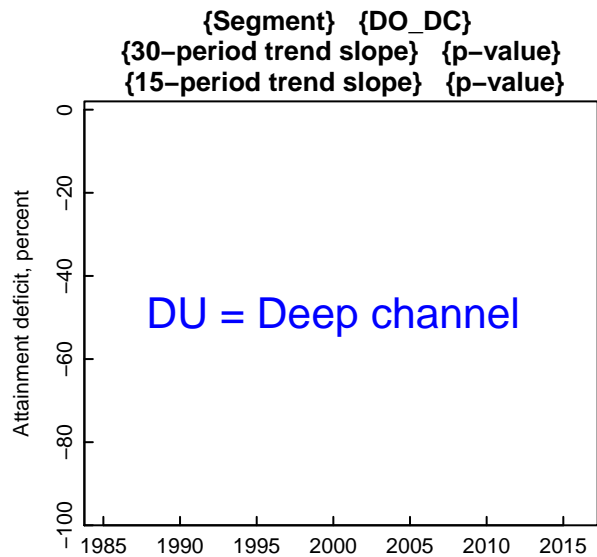

ANATF\_DC DO\_OW

30-period trend slope: 0.44 p-value: 0.18

15-period trend slope: -1 p-value: 2e-05

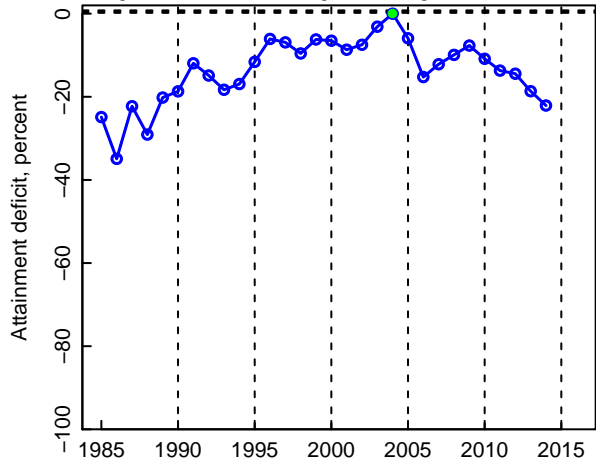

ANATF\_DC DO\_DW

30-period trend slope: NA p-value: NA

15-period trend slope: NA p-value: NA

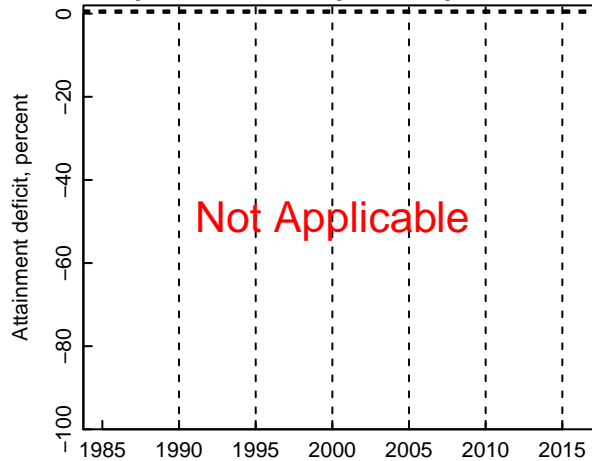

ANATF\_DC DO\_DC

30-period trend slope: NA p-value: NA

15-period trend slope: NA p-value: NA

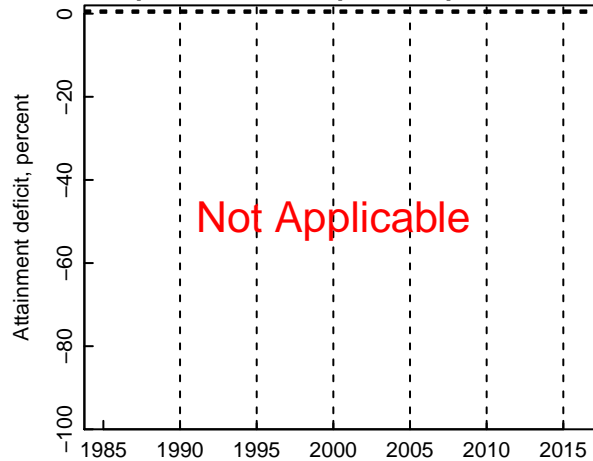

ANATF\_MD DO\_OW

30-period trend slope: -0.35 p-value: 0.52

15-period trend slope: -2.5 p-value: 0.033

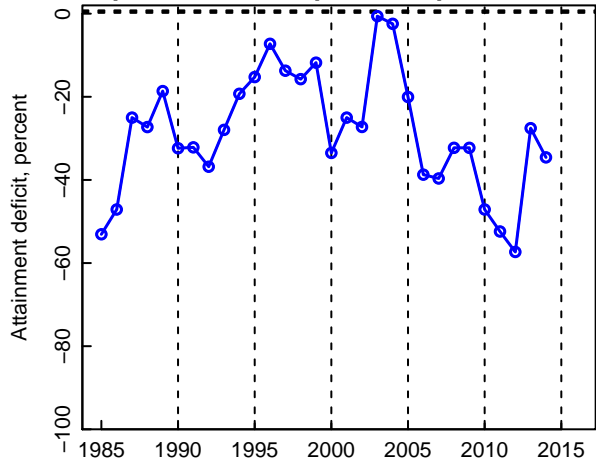

ANATF\_MD DO\_DW

30-period trend slope: NA p-value: NA

15-period trend slope: NA p-value: NA

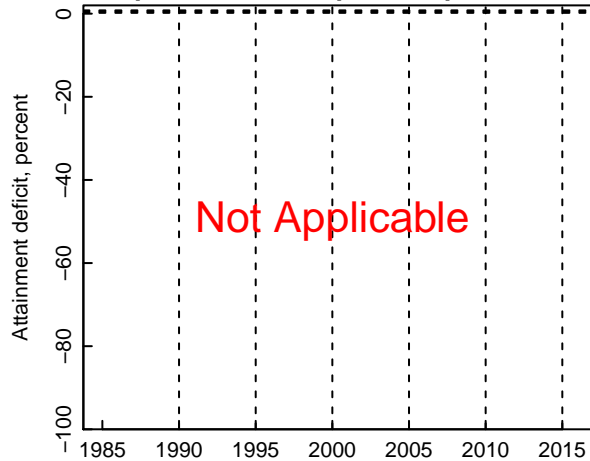

ANATF\_MD DO\_DC

30-period trend slope: NA p-value: NA

15-period trend slope: NA p-value: NA

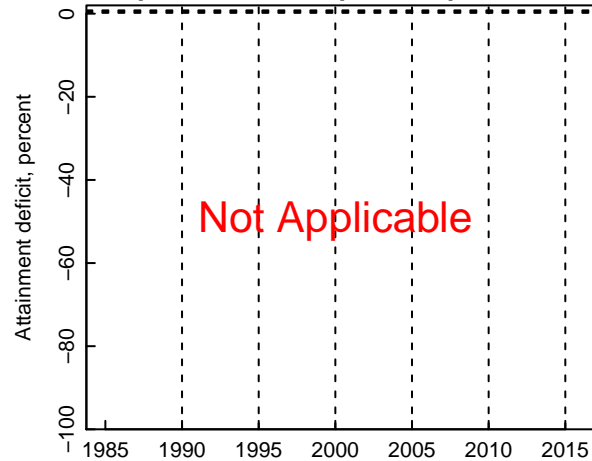

**APPTF DO\_OW**

30-period trend slope: 0 p-value: 0.23  
15-period trend slope: 0 p-value: NaN

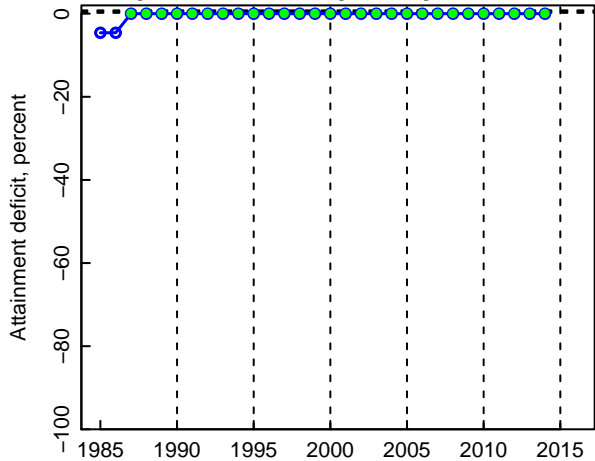**APPTF DO\_DW**

30-period trend slope: NA p-value: NA  
15-period trend slope: NA p-value: NA

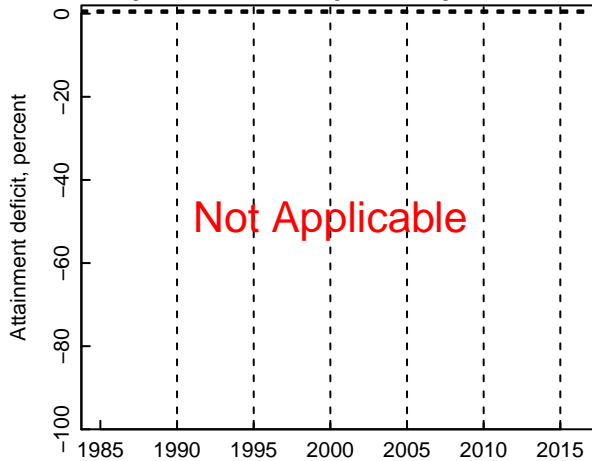**APPTF DO\_DC**

30-period trend slope: NA p-value: NA  
15-period trend slope: NA p-value: NA

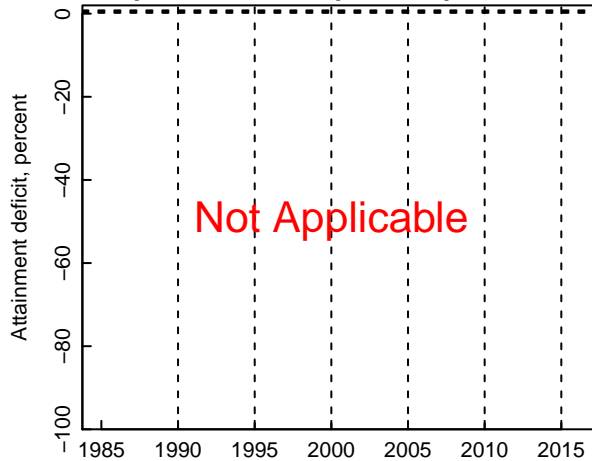

**BACOH DO\_OW**

30-period trend slope: 0 p-value: 0.58  
15-period trend slope: 0 p-value: 0.042

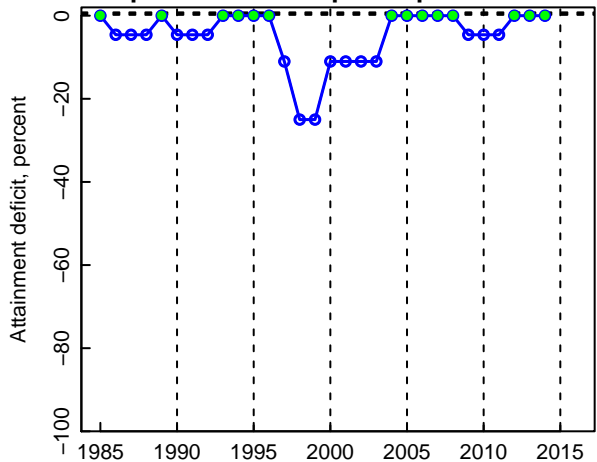**BACOH DO\_DW**

30-period trend slope: NA p-value: NA  
15-period trend slope: NA p-value: NA

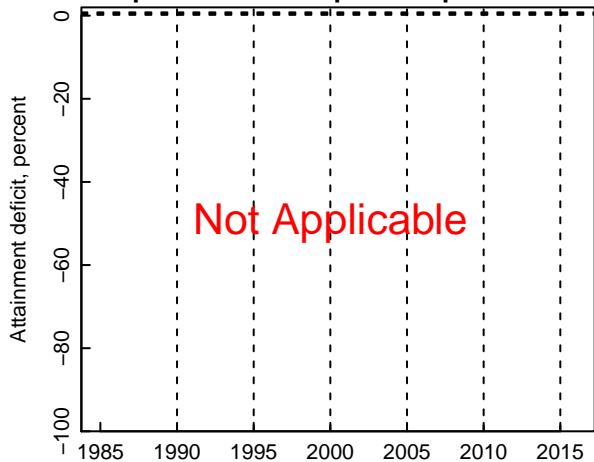**BACOH DO\_DC**

30-period trend slope: NA p-value: NA  
15-period trend slope: NA p-value: NA

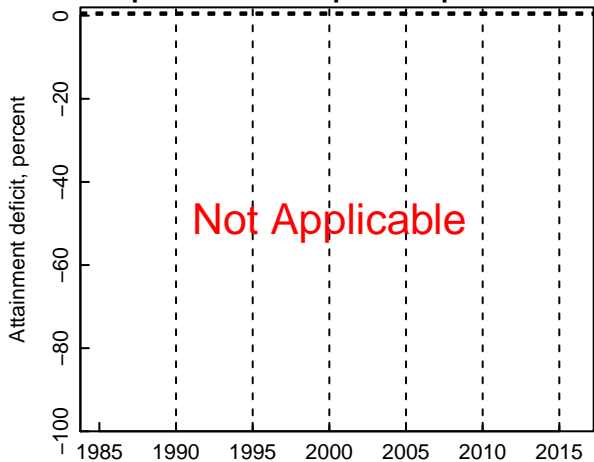

**BIGMH DO\_OW**

30-period trend slope: 0 p-value: NaN  
15-period trend slope: 0 p-value: NaN

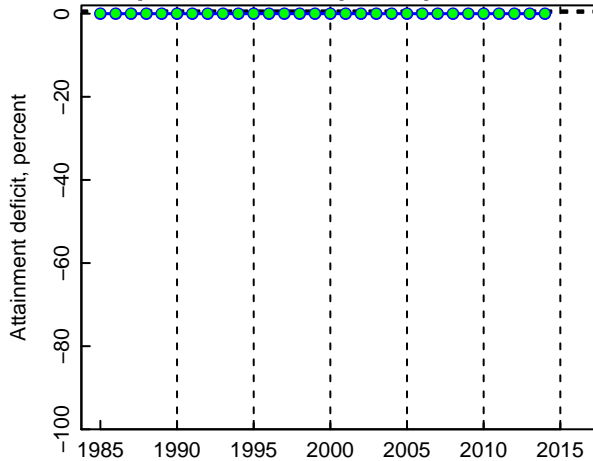**BIGMH DO\_DW**

30-period trend slope: NA p-value: NA  
15-period trend slope: NA p-value: NA

**BIGMH DO\_DC**

30-period trend slope: NA p-value: NA  
15-period trend slope: NA p-value: NA



BOHOH DO\_OW

30-period trend slope: 0 p-value: 0.93  
15-period trend slope: 0 p-value: 0.12

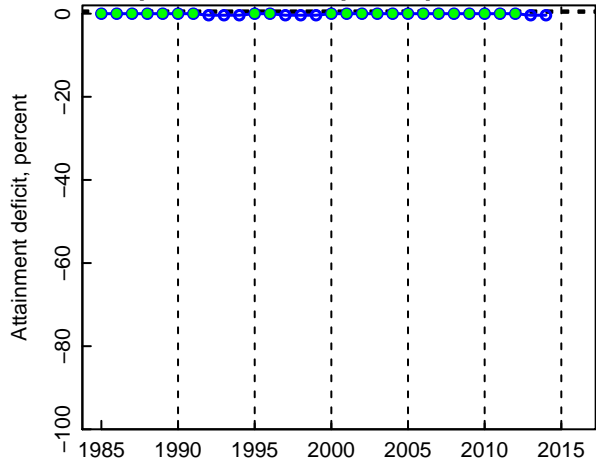

BOHOH DO\_DW

30-period trend slope: NA p-value: NA  
15-period trend slope: NA p-value: NA



BOHOH DO\_DC

30-period trend slope: NA p-value: NA  
15-period trend slope: NA p-value: NA

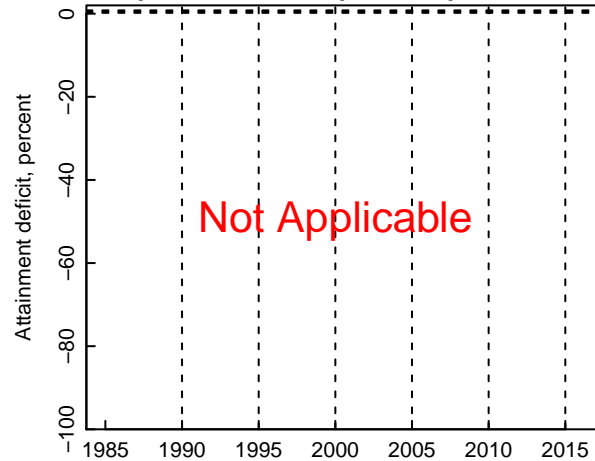

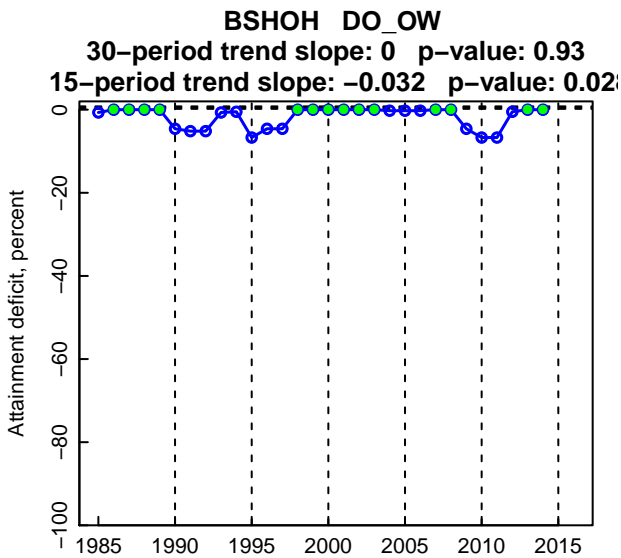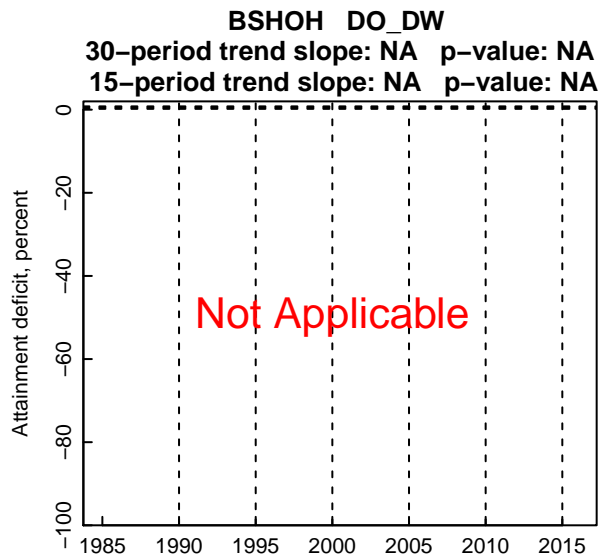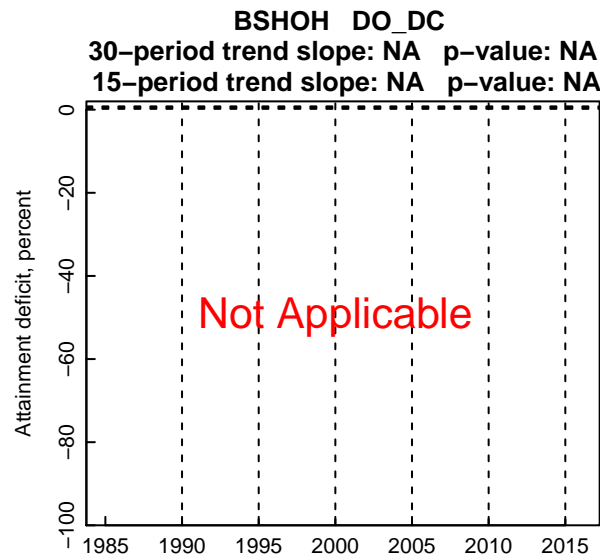



C&DOH\_DE DO\_OW

30-period trend slope: 0 p-value: NaN

15-period trend slope: 0 p-value: NaN

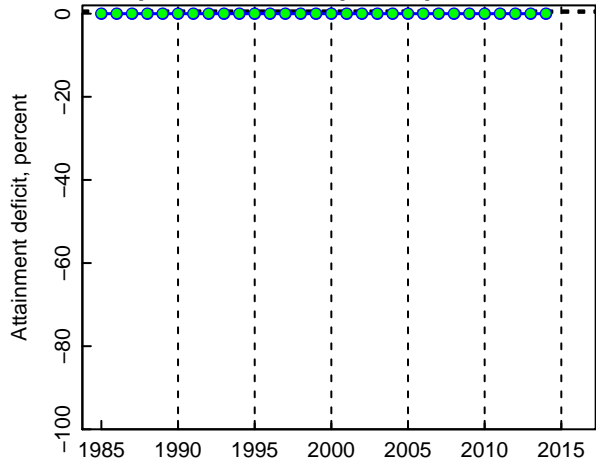

C&DOH\_DE DO\_DW

30-period trend slope: NA p-value: NA

15-period trend slope: NA p-value: NA

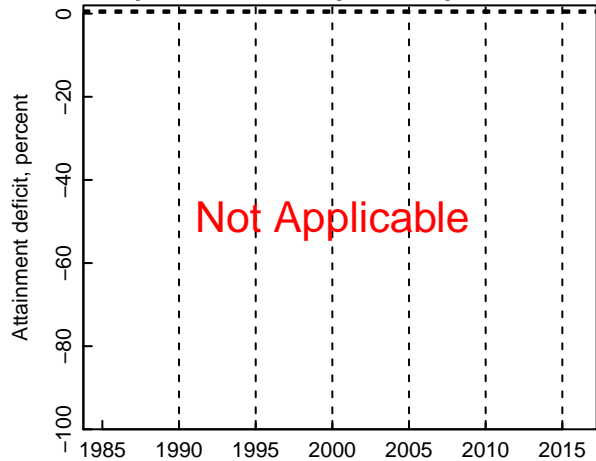

C&DOH\_DE DO\_DC

30-period trend slope: NA p-value: NA

15-period trend slope: NA p-value: NA

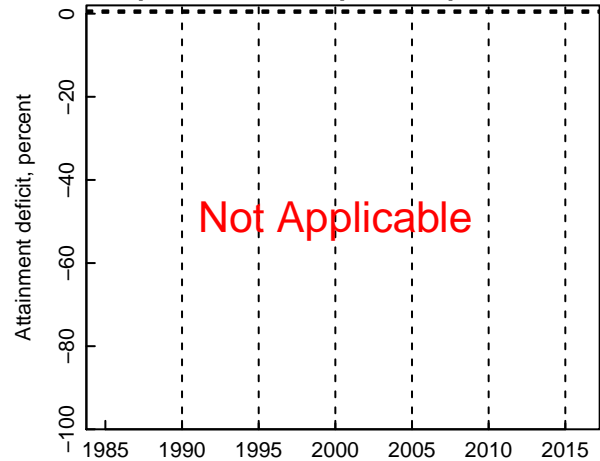

C&DOH\_MD DO\_OW

30-period trend slope: 0 p-value: NaN

15-period trend slope: 0 p-value: NaN



C&DOH\_MD DO\_DW

30-period trend slope: NA p-value: NA

15-period trend slope: NA p-value: NA



C&DOH\_MD DO\_DC

30-period trend slope: NA p-value: NA

15-period trend slope: NA p-value: NA

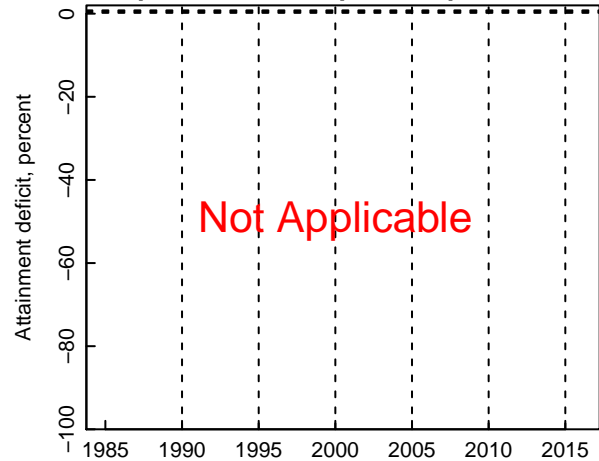

**CB1TF DO\_OW**

30-period trend slope: 0 p-value: NaN  
15-period trend slope: 0 p-value: NaN

**CB1TF DO\_DW**

30-period trend slope: NA p-value: NA  
15-period trend slope: NA p-value: NA

**CB1TF DO\_DC**

30-period trend slope: NA p-value: NA  
15-period trend slope: NA p-value: NA



CB2OH DO\_OW

30-period trend slope:  $-0.01$  p-value: 0.5  
15-period trend slope:  $0.014$  p-value: 0.37

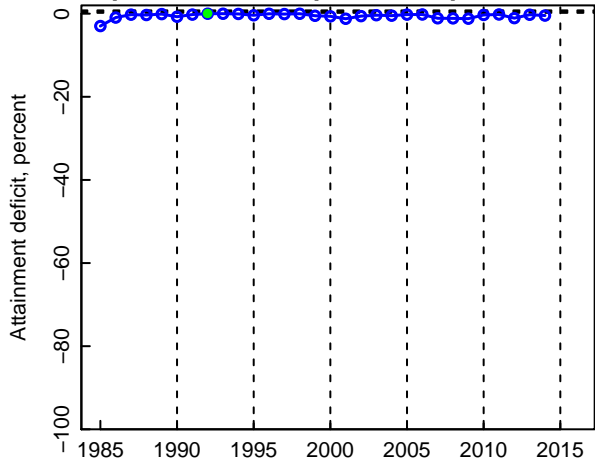

CB2OH DO\_DW

30-period trend slope: NA p-value: NA  
15-period trend slope: NA p-value: NA

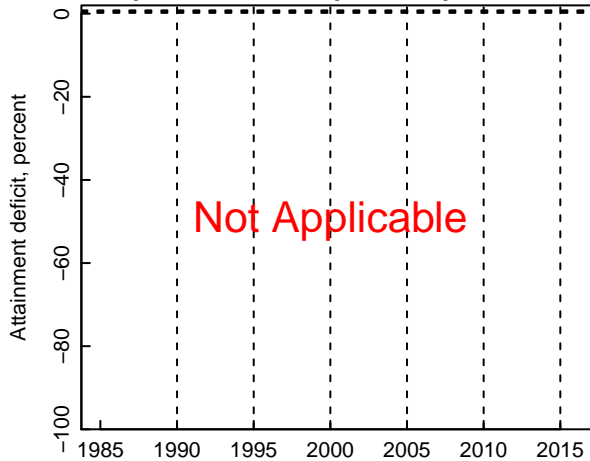

CB2OH DO\_DC

30-period trend slope: NA p-value: NA  
15-period trend slope: NA p-value: NA

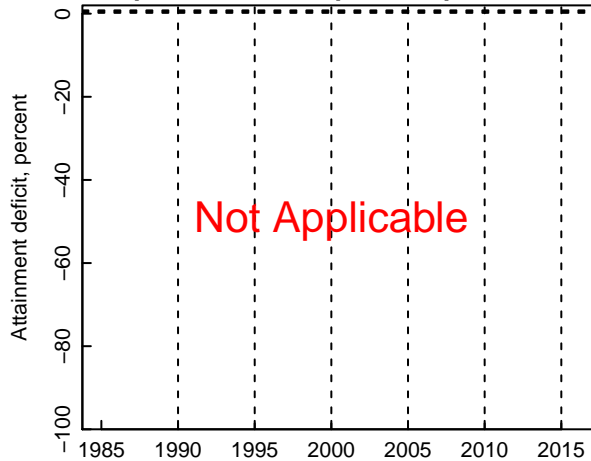

**CB3MH DO\_OW**

30-period trend slope: 0 p-value: NaN

15-period trend slope: 0 p-value: NaN

**CB3MH DO\_DW**

30-period trend slope: -0.053 p-value: 0.08

15-period trend slope: -0.17 p-value: 0.048

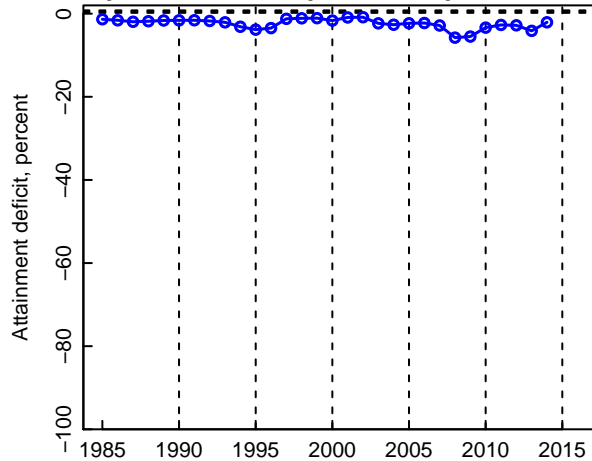**CB3MH DO\_DC**

30-period trend slope: -0.21 p-value: 2e-05

15-period trend slope: 0.14 p-value: 0.36

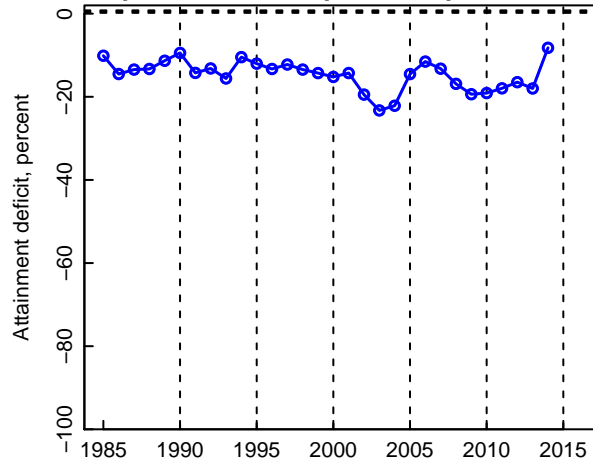

**CB4MH DO\_OW**

30-period trend slope: 0 p-value: NaN  
15-period trend slope: 0 p-value: NaN

**CB4MH DO\_DW**

30-period trend slope: -0.0092 p-value: 0.81  
15-period trend slope: 0.088 p-value: 0.49

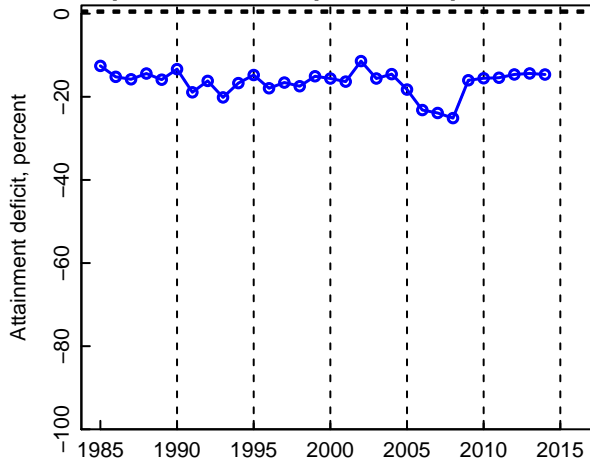**CB4MH DO\_DC**

30-period trend slope: 0.03 p-value: 0.95  
15-period trend slope: 0.5 p-value: 0.01

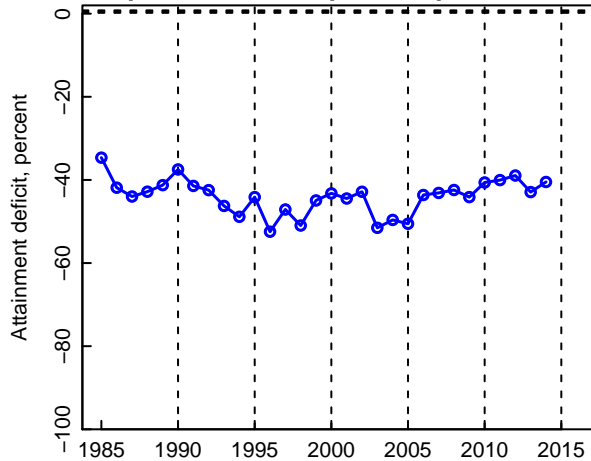

CB5MH\_MD DO\_OW

30-period trend slope: 0 p-value: 0.57

15-period trend slope: 0 p-value: NaN

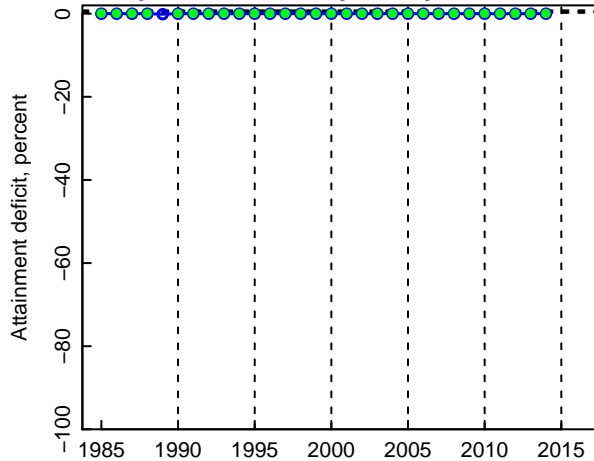

CB5MH\_MD DO\_DW

30-period trend slope: 0.17 p-value: 0.061

15-period trend slope: 0.24 p-value: 0.092

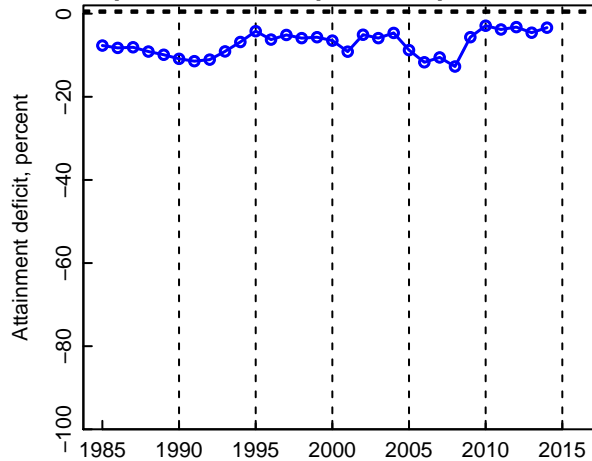

CB5MH\_MD DO\_DC

30-period trend slope: -0.0032 p-value: 1

15-period trend slope: 0.54 p-value: 0.052

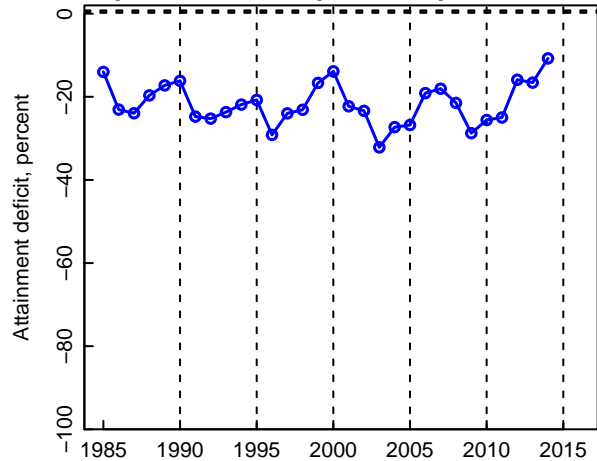

CB5MH\_VA DO\_OW

30-period trend slope: 0 p-value: 0.23

15-period trend slope: 0 p-value: 0.18

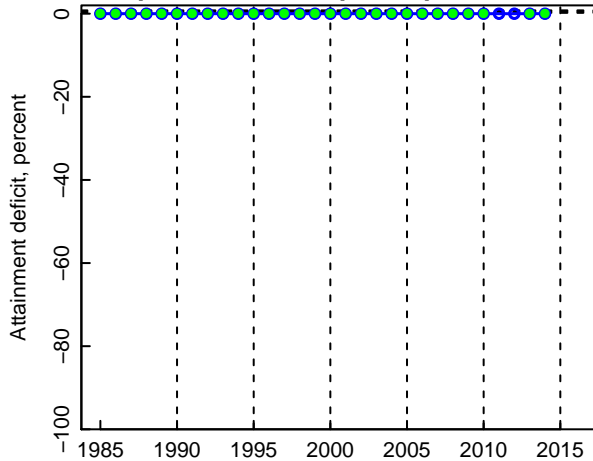

CB5MH\_VA DO\_DW

30-period trend slope: -0.027 p-value: 0.017

15-period trend slope: -0.085 p-value: 0.11

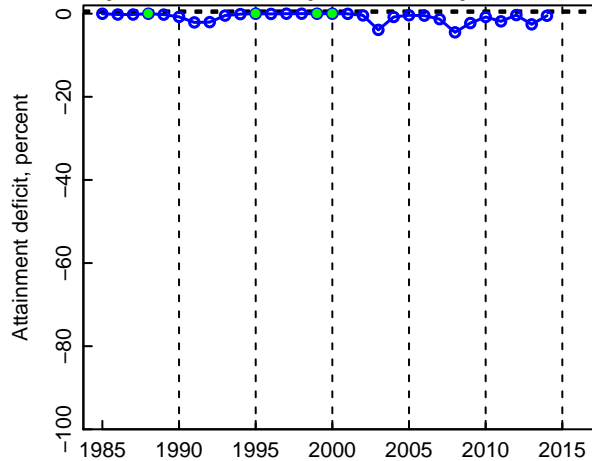

CB5MH\_VA DO\_DC

30-period trend slope: 0.046 p-value: 0.14

15-period trend slope: 0.6 p-value: 1.3e-08

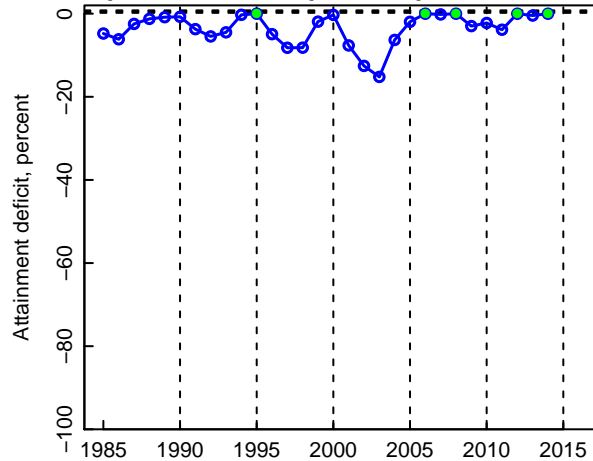



**CB6PH DO\_OW****30-period trend slope: 0.1 p-value: 0.0083****15-period trend slope: 0 p-value: 0.42**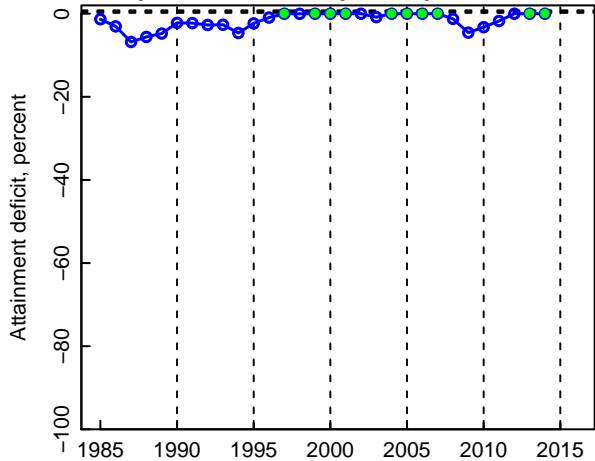**CB6PH DO\_DW****30-period trend slope: 0 p-value: 0.66****15-period trend slope: 0 p-value: 0.75**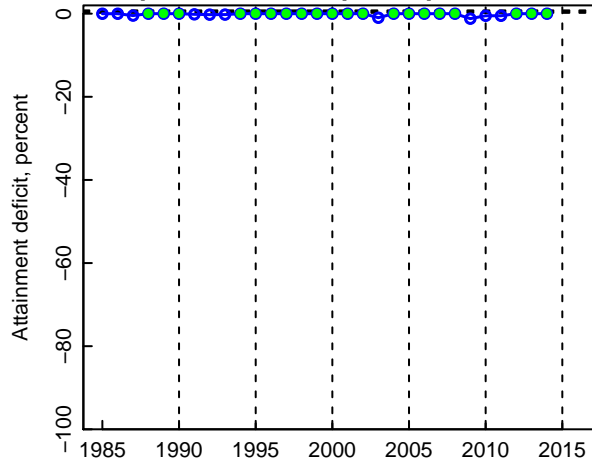**CB6PH DO\_DC****30-period trend slope: NA p-value: NA****15-period trend slope: NA p-value: NA**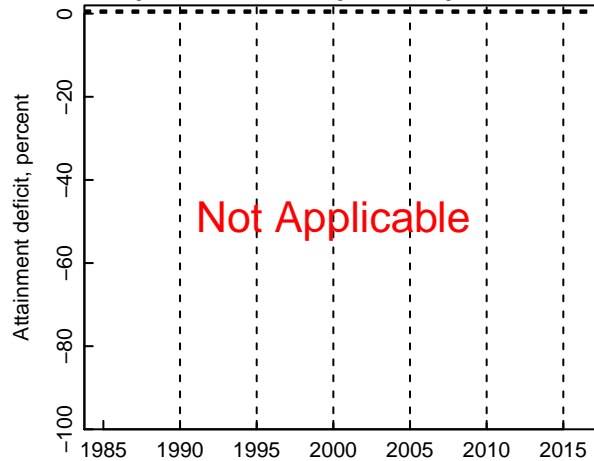

**CB7PH DO\_OW**

30-period trend slope: 0.18 p-value: 0.044  
15-period trend slope: -0.091 p-value: 0.62

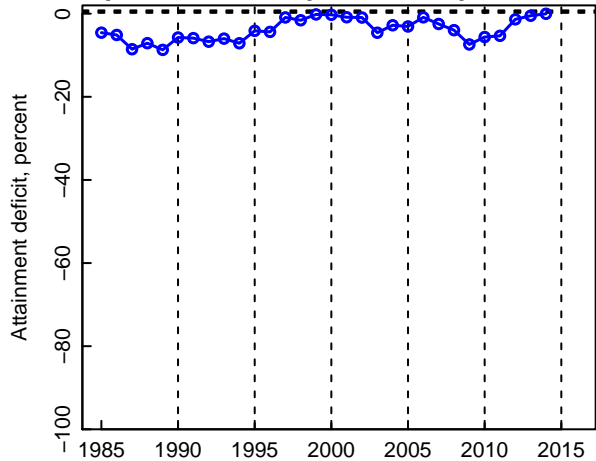**CB7PH DO\_DW**

30-period trend slope: 0 p-value: NaN  
15-period trend slope: 0 p-value: NaN

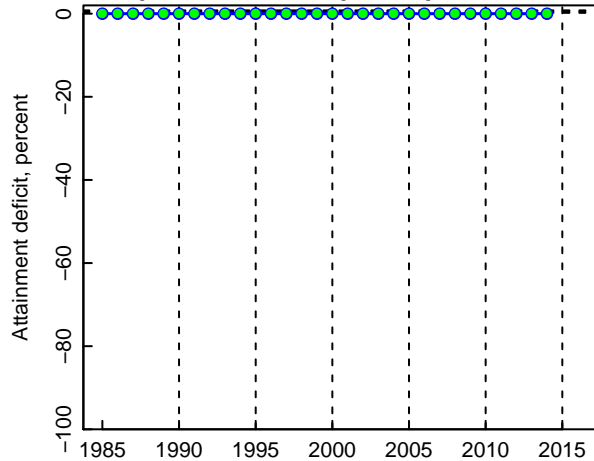**CB7PH DO\_DC**

30-period trend slope: NA p-value: NA  
15-period trend slope: NA p-value: NA



**CB8PH DO\_OW**

30-period trend slope: 0 p-value: 0.12  
15-period trend slope: 0 p-value: NaN

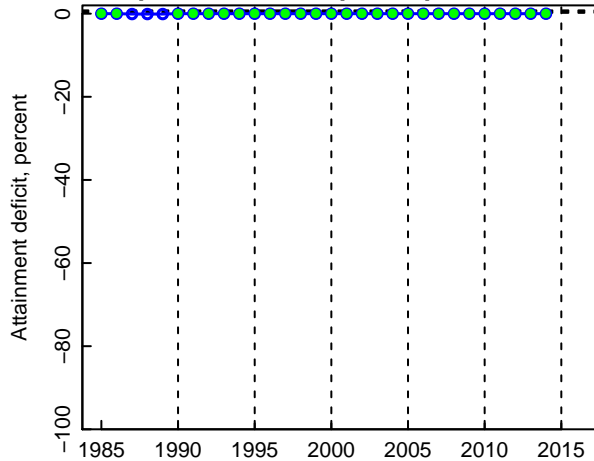**CB8PH DO\_DW**

30-period trend slope: NA p-value: NA  
15-period trend slope: NA p-value: NA

**CB8PH DO\_DC**

30-period trend slope: NA p-value: NA  
15-period trend slope: NA p-value: NA



**CHKOH DO\_OW**

30-period trend slope: 0 p-value: 0.26  
15-period trend slope: 0 p-value: 0.77

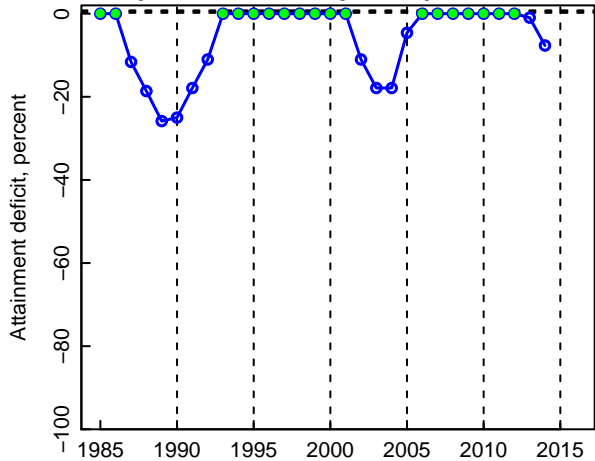**CHKOH DO\_DW**

30-period trend slope: NA p-value: NA  
15-period trend slope: NA p-value: NA

**CHKOH DO\_DC**

30-period trend slope: NA p-value: NA  
15-period trend slope: NA p-value: NA



### CHOMH1 DO\_OW

30-period trend slope:  $-0.026$  p-value: 0.2  
15-period trend slope:  $0.096$  p-value: 0.038

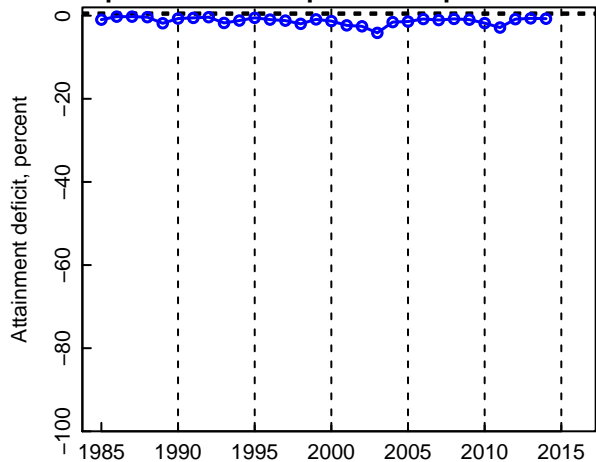

### CHOMH1 DO\_DW

30-period trend slope: NA p-value: NA  
15-period trend slope: NA p-value: NA

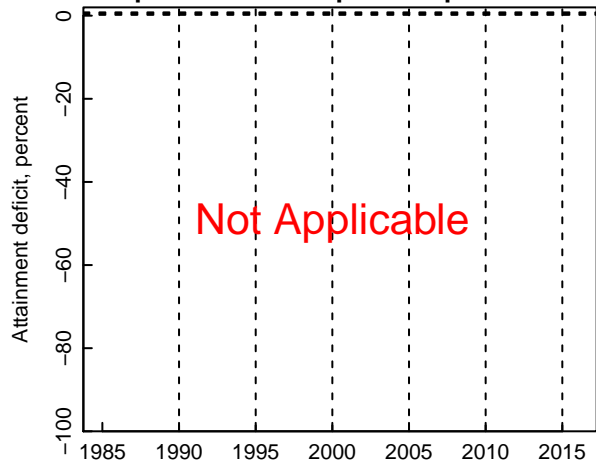

### CHOMH1 DO\_DC

30-period trend slope: NA p-value: NA  
15-period trend slope: NA p-value: NA

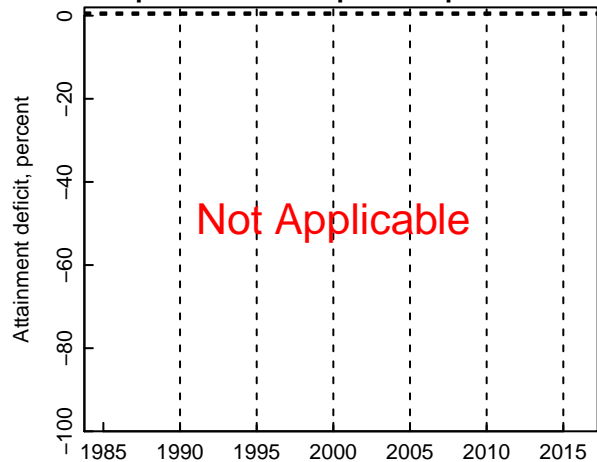

**CHOMH2 DO\_OW****30-period trend slope: -0.049 p-value: 0.63****15-period trend slope: 0.83 p-value: 1.5e-01**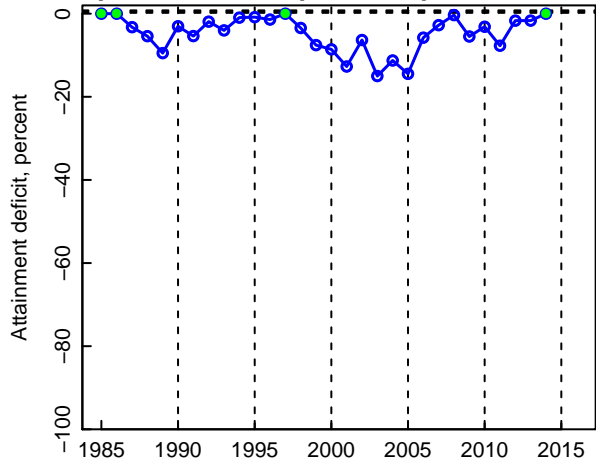**CHOMH2 DO\_DW****30-period trend slope: NA p-value: NA****15-period trend slope: NA p-value: NA****CHOMH2 DO\_DC****30-period trend slope: NA p-value: NA****15-period trend slope: NA p-value: NA**

**CHOOH DO\_OW****30-period trend slope: -0.59 p-value: 0.03****15-period trend slope: 0.89 p-value: 0.01**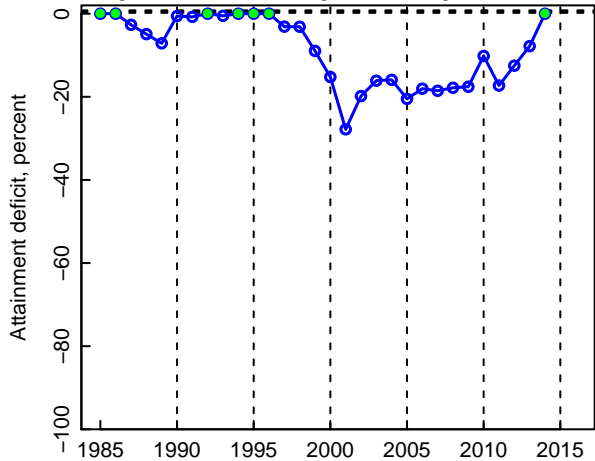**CHOOH DO\_DW****30-period trend slope: NA p-value: NA****15-period trend slope: NA p-value: NA****CHOOH DO\_DC****30-period trend slope: NA p-value: NA****15-period trend slope: NA p-value: NA**

**CHOTF DO\_OW**

30-period trend slope: -1 p-value: 0.026

15-period trend slope: 2.4 p-value: 0.00063

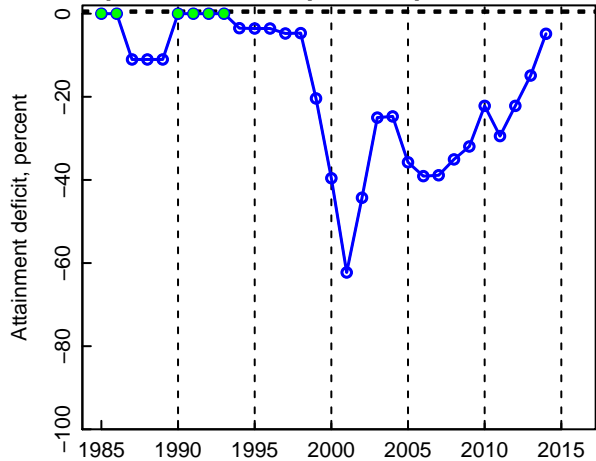**CHOTF DO\_DW**

30-period trend slope: NA p-value: NA

15-period trend slope: NA p-value: NA

**CHOTF DO\_DC**

30-period trend slope: NA p-value: NA

15-period trend slope: NA p-value: NA





**CHSMH DO\_OW**

30-period trend slope: 0 p-value: 0.77

15-period trend slope: 0 p-value: 0.13

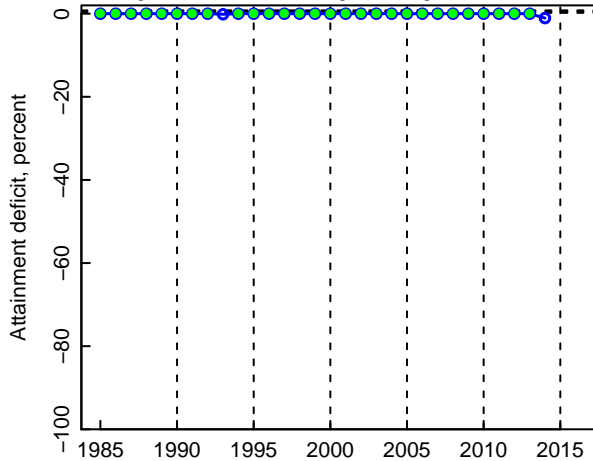**CHSMH DO\_DW**

30-period trend slope: -0.19 p-value: 0.55

15-period trend slope: -0.75 p-value: 0.67

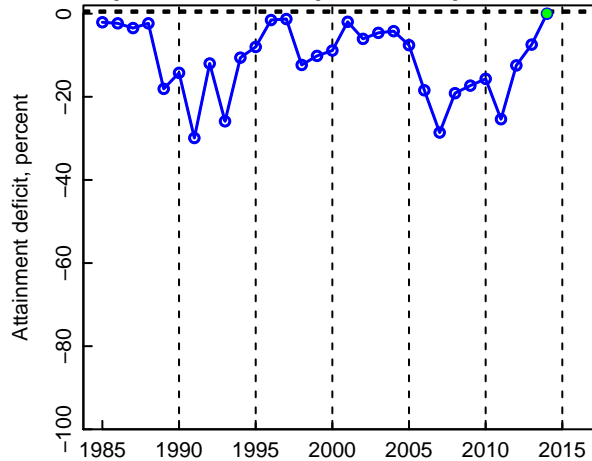**CHSMH DO\_DC**

30-period trend slope: 0.7 p-value: 0.02

15-period trend slope: 1.4 p-value: 0.00035

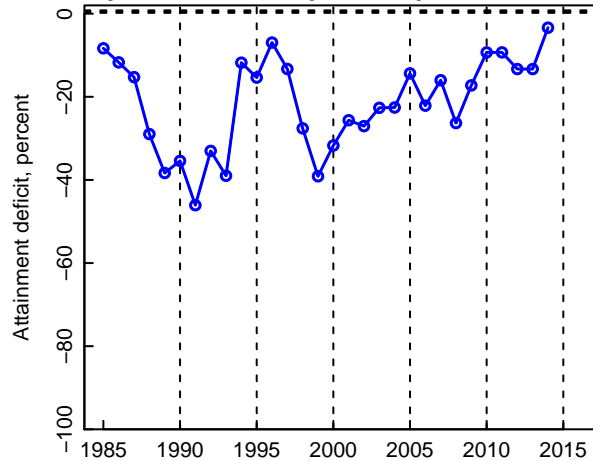

**CHSOH DO\_OW**  
30-period trend slope:  $-0.03$  p-value: 0.0009  
15-period trend slope:  $0.011$  p-value: 0.97

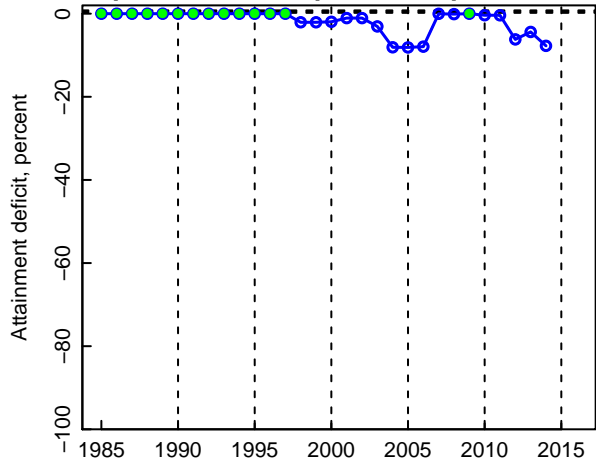

**CHSOH DO\_DW**  
30-period trend slope: NA p-value: NA  
15-period trend slope: NA p-value: NA



**CHSOH DO\_DC**  
30-period trend slope: NA p-value: NA  
15-period trend slope: NA p-value: NA



**CHSTF DO\_OW****30-period trend slope: -0.2 p-value: 0.0035****15-period trend slope: -0.49 p-value: 0.014**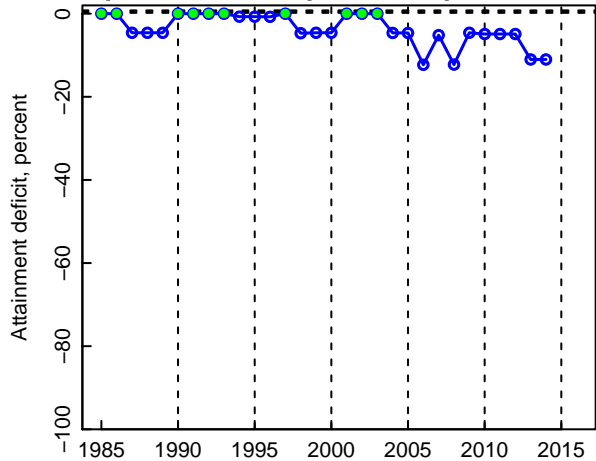**CHSTF DO\_DW****30-period trend slope: NA p-value: NA****15-period trend slope: NA p-value: NA****CHSTF DO\_DC****30-period trend slope: NA p-value: NA****15-period trend slope: NA p-value: NA**

**CRRMH DO\_OW**

30-period trend slope: 0.15 p-value: 0.31  
15-period trend slope: 0.65 p-value: 0.029

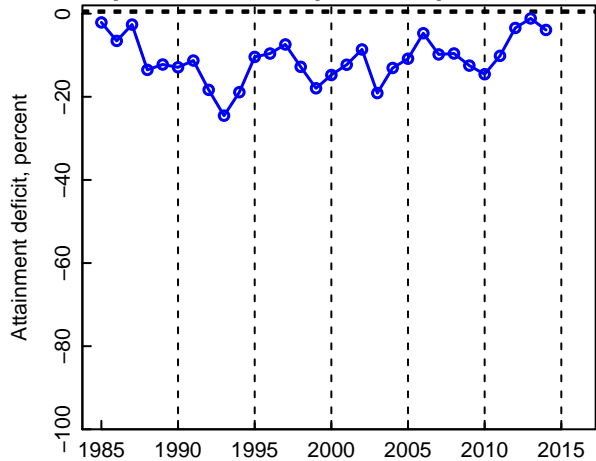**CRRMH DO\_DW**

30-period trend slope: NA p-value: NA  
15-period trend slope: NA p-value: NA

**CRRMH DO\_DC**

30-period trend slope: NA p-value: NA  
15-period trend slope: NA p-value: NA



**EASMH DO\_OW**

30-period trend slope: 0 p-value: NaN  
15-period trend slope: 0 p-value: NaN

**EASMH DO\_DW**

30-period trend slope: 0.063 p-value: 0.57  
15-period trend slope: 0.14 p-value: 0.62

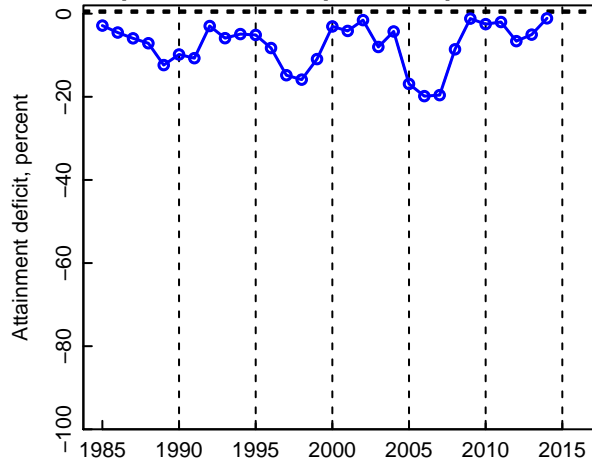**EASMH DO\_DC**

30-period trend slope: -0.12 p-value: 0.018  
15-period trend slope: 0.15 p-value: 0.65

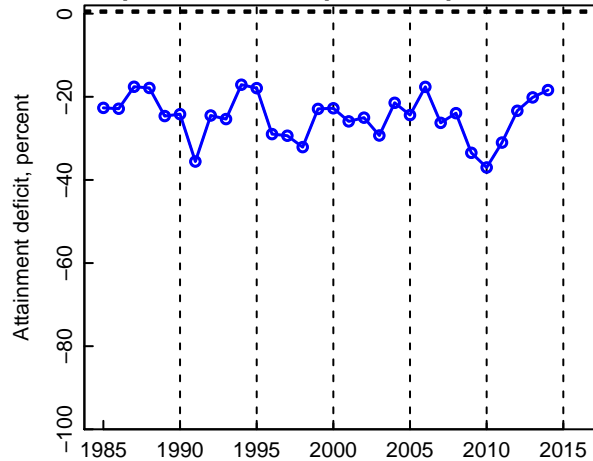

**EBEMH DO\_OW**

30-period trend slope:  $-0.63$  p-value:  $0.37$   
15-period trend slope:  $-1.9$  p-value:  $1.5e-04$

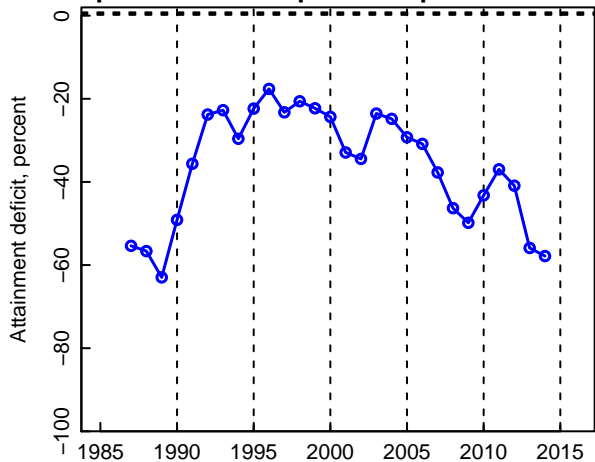**EBEMH DO\_DW**

30-period trend slope: NA p-value: NA  
15-period trend slope: NA p-value: NA

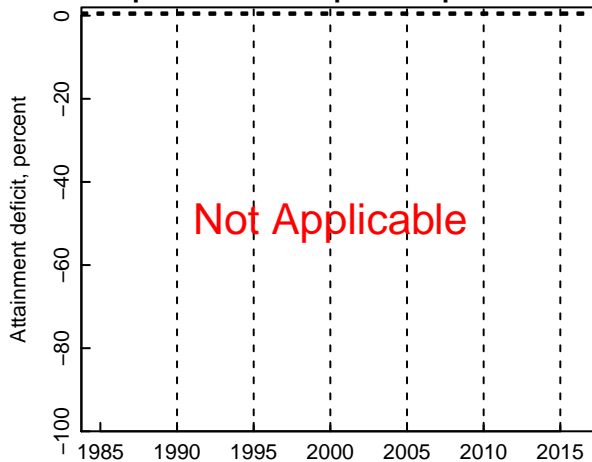**EBEMH DO\_DC**

30-period trend slope: NA p-value: NA  
15-period trend slope: NA p-value: NA

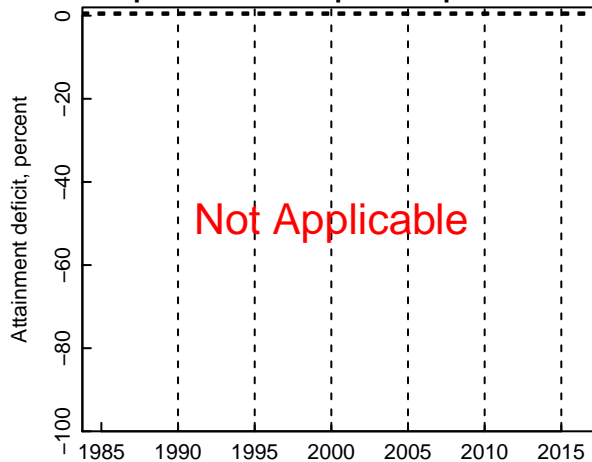

### ELIPH DO\_OW

30-period trend slope: -0.21 p-value: 0.39

15-period trend slope: -1.1 p-value: NaN

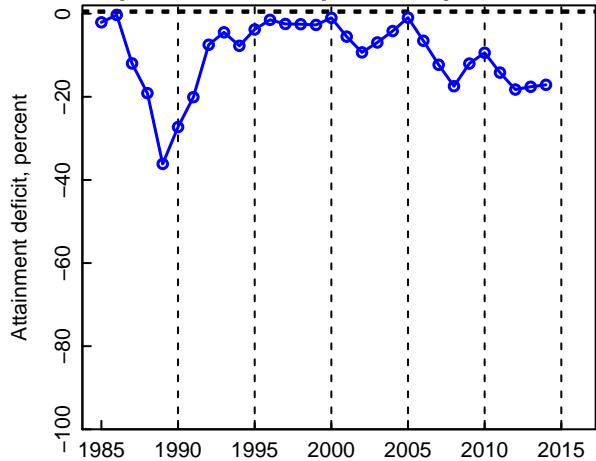

### ELIPH DO\_DW

30-period trend slope: NA p-value: NA

15-period trend slope: NA p-value: NA



### ELIPH DO\_DC

30-period trend slope: NA p-value: NA

15-period trend slope: NA p-value: NA



ELKOH DO\_OW

30-period trend slope: 0 p-value: NaN

15-period trend slope: 0 p-value: NaN

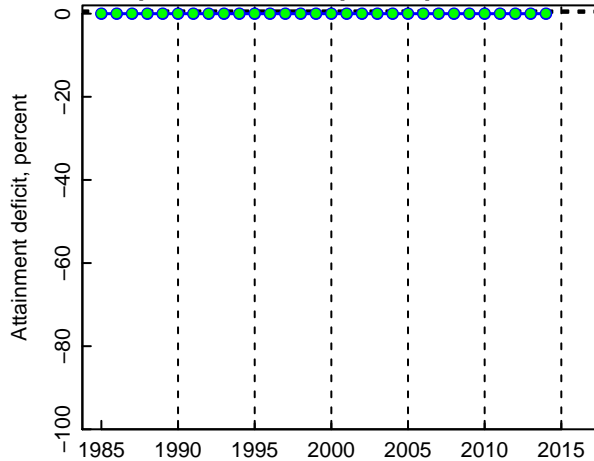

ELKOH DO\_DW

30-period trend slope: NA p-value: NA

15-period trend slope: NA p-value: NA

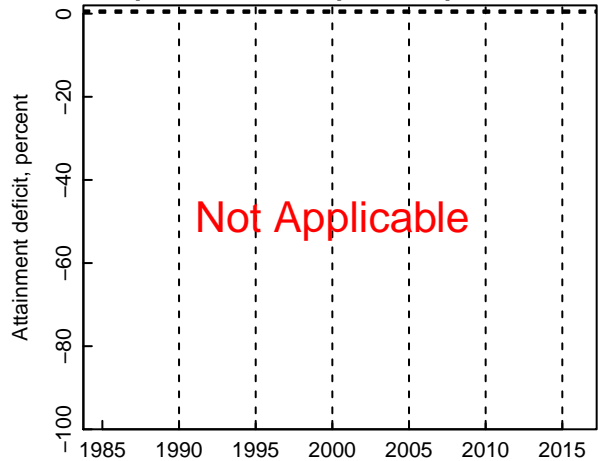

ELKOH DO\_DC

30-period trend slope: NA p-value: NA

15-period trend slope: NA p-value: NA

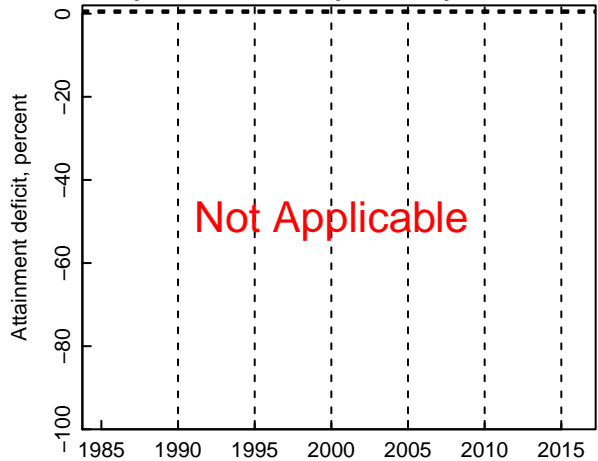



FSBMH DO\_OW

30-period trend slope: 0 p-value: 0.73  
15-period trend slope: 0 p-value: NaN

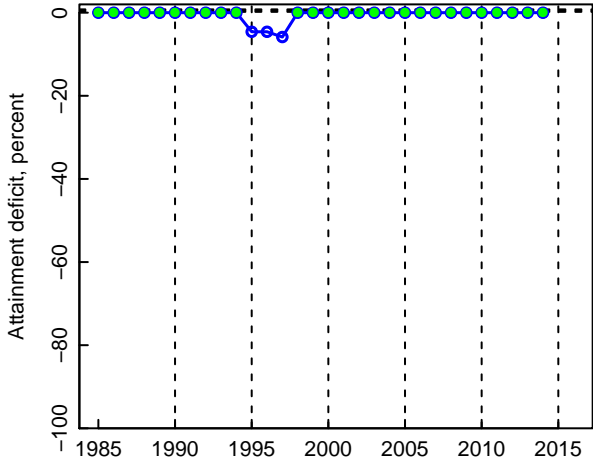

FSBMH DO\_DW

30-period trend slope: NA p-value: NA  
15-period trend slope: NA p-value: NA

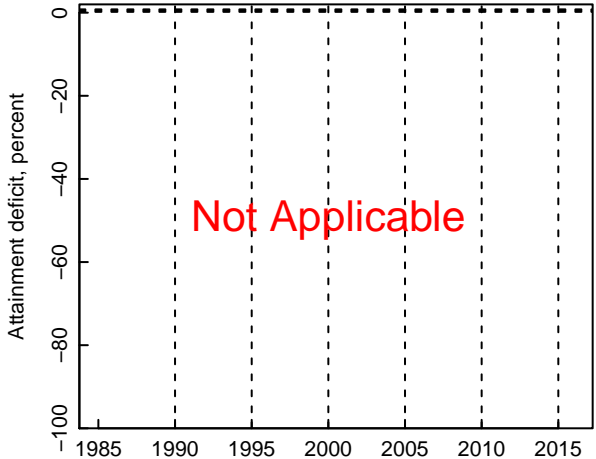

FSBMH DO\_DC

30-period trend slope: NA p-value: NA  
15-period trend slope: NA p-value: NA

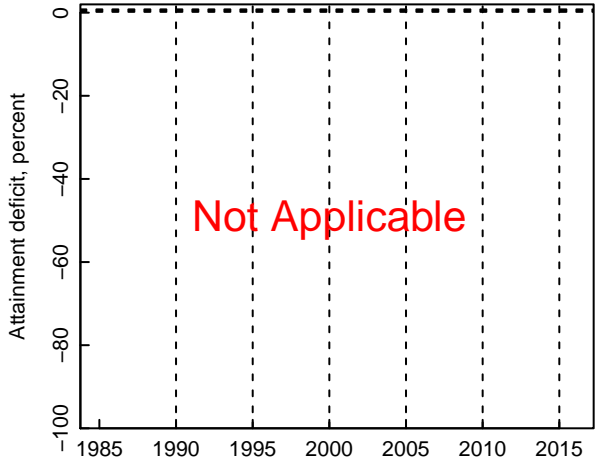

GUNOH DO\_OW

30-period trend slope: 0 p-value: 0.84  
15-period trend slope: 0 p-value: 0.073

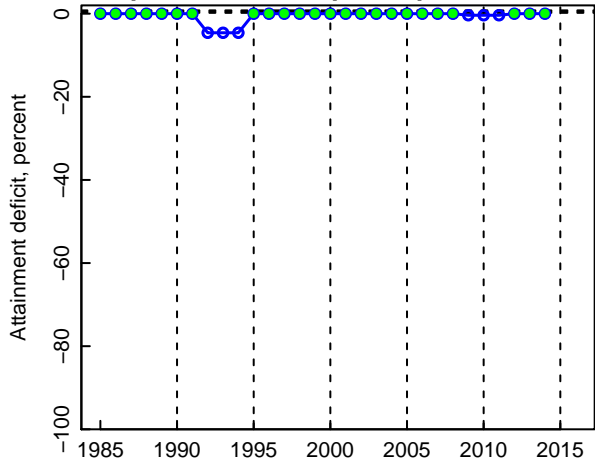

GUNOH DO\_DW

30-period trend slope: NA p-value: NA  
15-period trend slope: NA p-value: NA



GUNOH DO\_DC

30-period trend slope: NA p-value: NA  
15-period trend slope: NA p-value: NA



HNGMH DO\_OW

30-period trend slope: NA p-value: NA  
15-period trend slope: NA p-value: NA

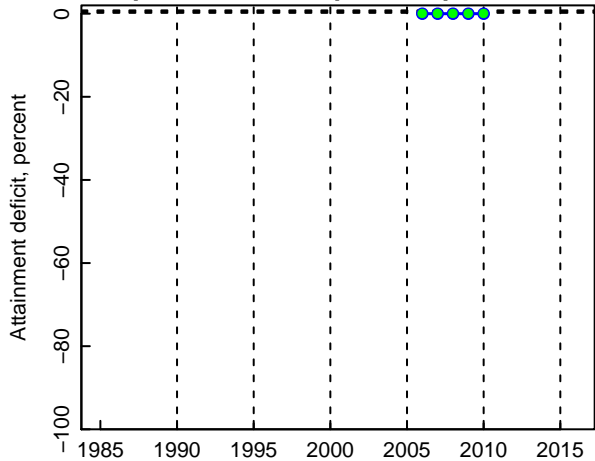

HNGMH DO\_DW

30-period trend slope: NA p-value: NA  
15-period trend slope: NA p-value: NA



HNGMH DO\_DC

30-period trend slope: NA p-value: NA  
15-period trend slope: NA p-value: NA



JMSMH DO\_OW

30-period trend slope: 0 p-value: NaN  
15-period trend slope: 0 p-value: NaN

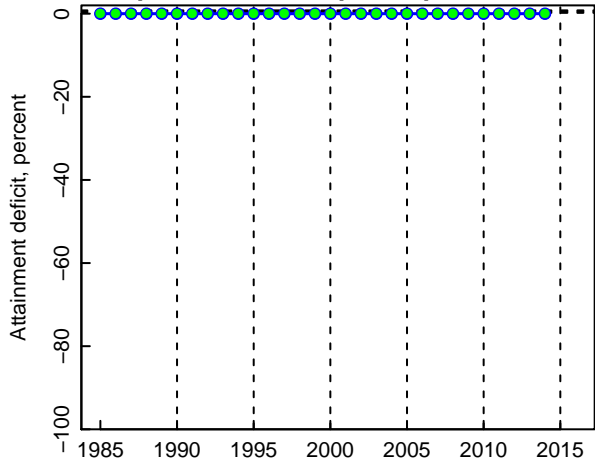

JMSMH DO\_DW

30-period trend slope: NA p-value: NA  
15-period trend slope: NA p-value: NA



JMSMH DO\_DC

30-period trend slope: NA p-value: NA  
15-period trend slope: NA p-value: NA



JMSOH DO\_OW

30-period trend slope: 0 p-value: 0.16  
15-period trend slope: 0 p-value: 0.14

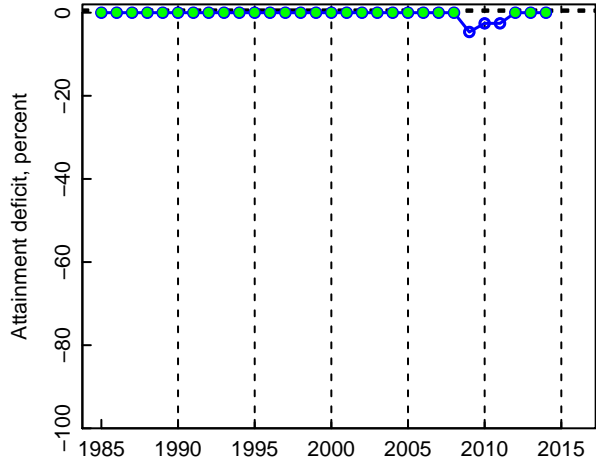

JMSOH DO\_DW

30-period trend slope: NA p-value: NA  
15-period trend slope: NA p-value: NA



JMSOH DO\_DC

30-period trend slope: NA p-value: NA  
15-period trend slope: NA p-value: NA

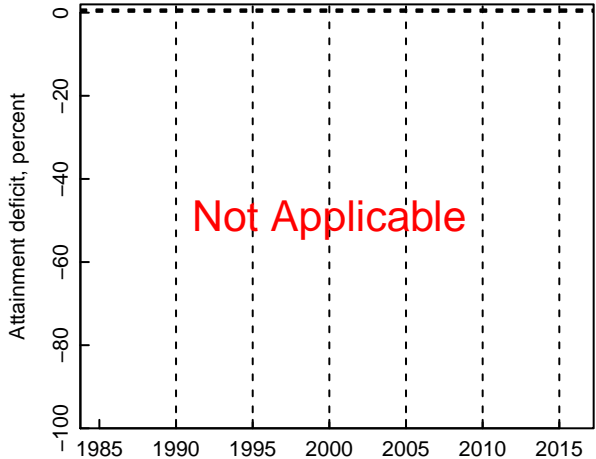

**JMSPH DO\_OW**

30-period trend slope: 0 p-value: 0.33  
15-period trend slope: 0 p-value: NaN

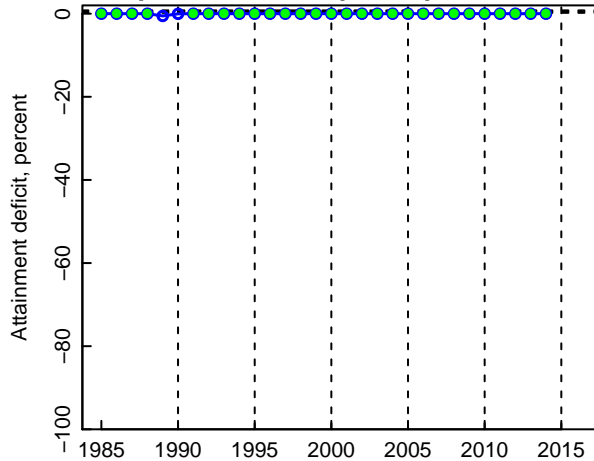**JMSPH DO\_DW**

30-period trend slope: NA p-value: NA  
15-period trend slope: NA p-value: NA

**JMSPH DO\_DC**

30-period trend slope: NA p-value: NA  
15-period trend slope: NA p-value: NA



**JMSTF1 DO\_OW**

30-period trend slope: 0.054 p-value: 0.24  
15-period trend slope: 0.53 p-value: 0.0042

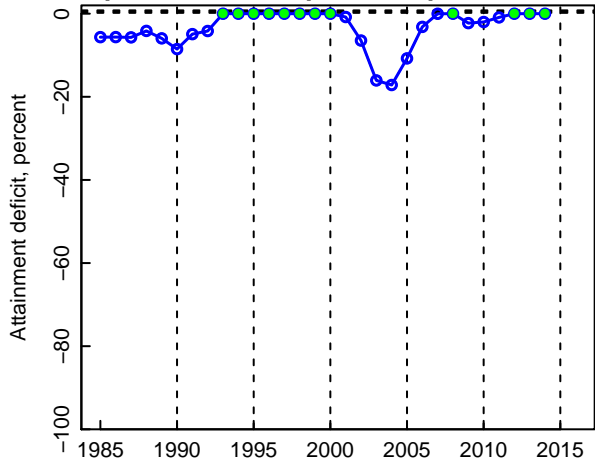**JMSTF1 DO\_DW**

30-period trend slope: NA p-value: NA  
15-period trend slope: NA p-value: NA

**JMSTF1 DO\_DC**

30-period trend slope: NA p-value: NA  
15-period trend slope: NA p-value: NA



JMSTF2 DO\_OW

30-period trend slope: 0 p-value: 0.54  
15-period trend slope: 0 p-value: 0.92

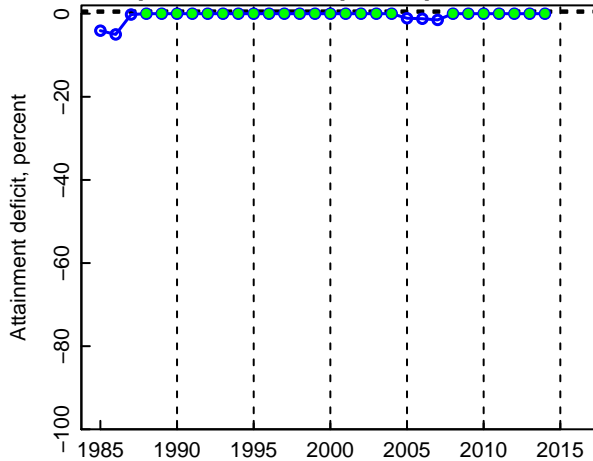

JMSTF2 DO\_DW

30-period trend slope: NA p-value: NA  
15-period trend slope: NA p-value: NA



JMSTF2 DO\_DC

30-period trend slope: NA p-value: NA  
15-period trend slope: NA p-value: NA





**LAFMH DO\_OW****30-period trend slope: -0.31 p-value: 0.37****15-period trend slope: 0.37 p-value: 0.67**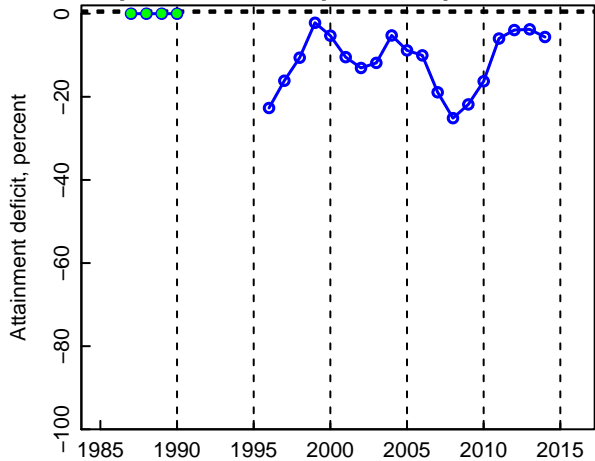**LAFMH DO\_DW****30-period trend slope: NA p-value: NA****15-period trend slope: NA p-value: NA****LAFMH DO\_DC****30-period trend slope: NA p-value: NA****15-period trend slope: NA p-value: NA**

**LCHMH DO\_OW**

30-period trend slope: 0.00037 p-value: 0.3  
15-period trend slope: 5e-06 p-value: 0.22

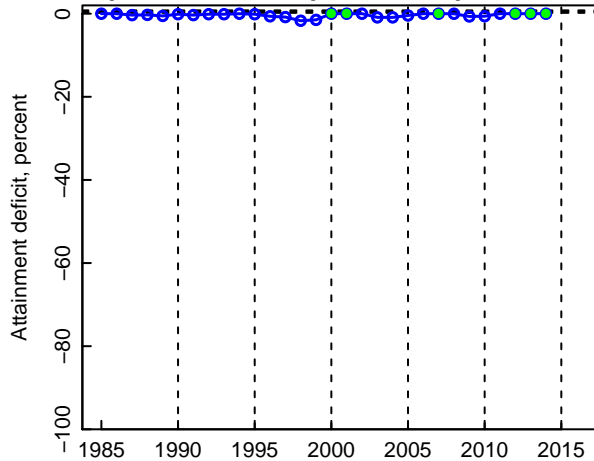**LCHMH DO\_DW**

30-period trend slope: NA p-value: NA  
15-period trend slope: NA p-value: NA

**LCHMH DO\_DC**

30-period trend slope: NA p-value: NA  
15-period trend slope: NA p-value: NA



LYNPH DO\_OW

30-period trend slope: NA p-value: NA  
15-period trend slope: NA p-value: NA

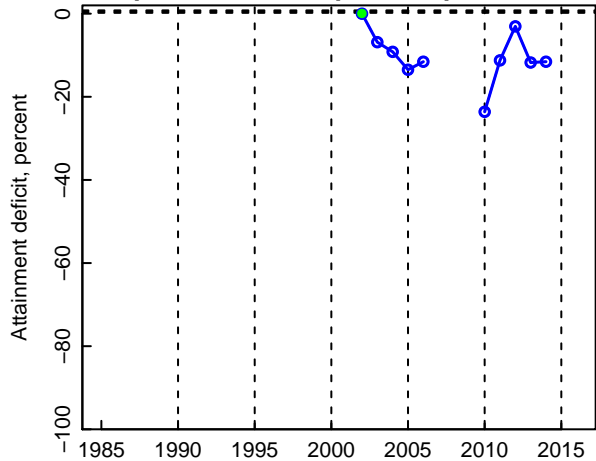

LYNPH DO\_DW

30-period trend slope: NA p-value: NA  
15-period trend slope: NA p-value: NA

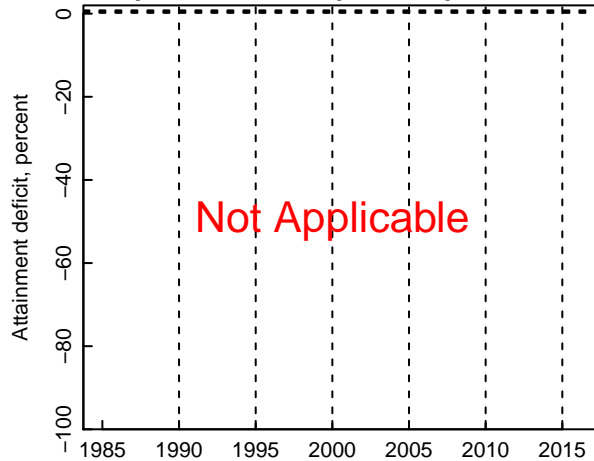

LYNPH DO\_DC

30-period trend slope: NA p-value: NA  
15-period trend slope: NA p-value: NA



**MAGMH DO\_OW**

30-period trend slope: 0 p-value: 0.54  
15-period trend slope: 0 p-value: 8.2e-05

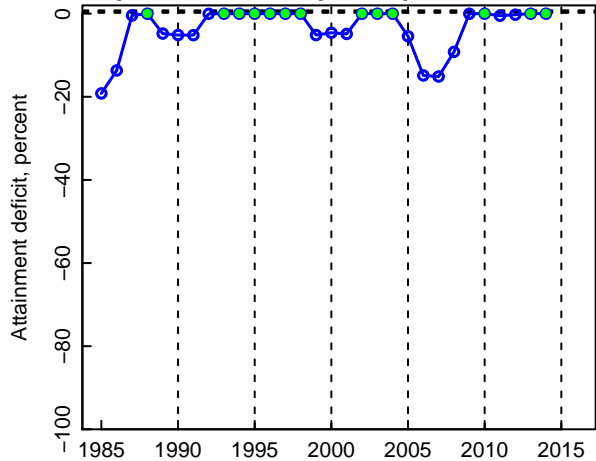**MAGMH DO\_DW**

30-period trend slope: 1 p-value: 0.021  
15-period trend slope: 1.6 p-value: 0.047

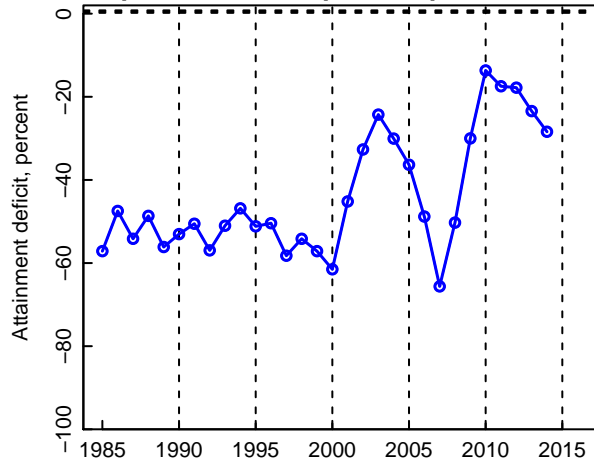**MAGMH DO\_DC**

30-period trend slope: NA p-value: NA  
15-period trend slope: NA p-value: NA



MANMH DO\_OW

30-period trend slope: 0 p-value: 0.92  
15-period trend slope: 0 p-value: 0.0017

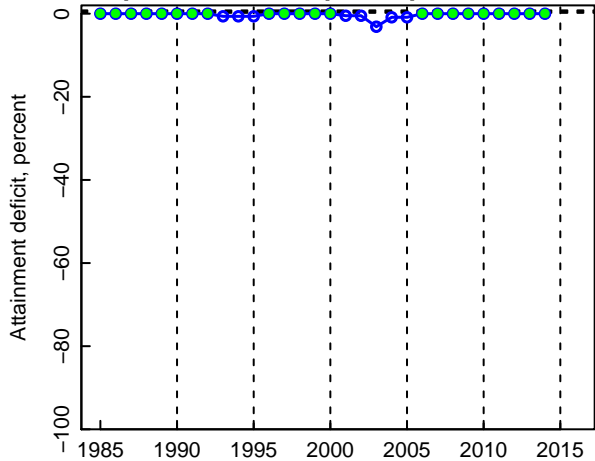

MANMH DO\_DW

30-period trend slope: NA p-value: NA  
15-period trend slope: NA p-value: NA



MANMH DO\_DC

30-period trend slope: NA p-value: NA  
15-period trend slope: NA p-value: NA



**MATTF DO\_OW**

30-period trend slope: 0 p-value: 0.25  
15-period trend slope: 0 p-value: 0.18

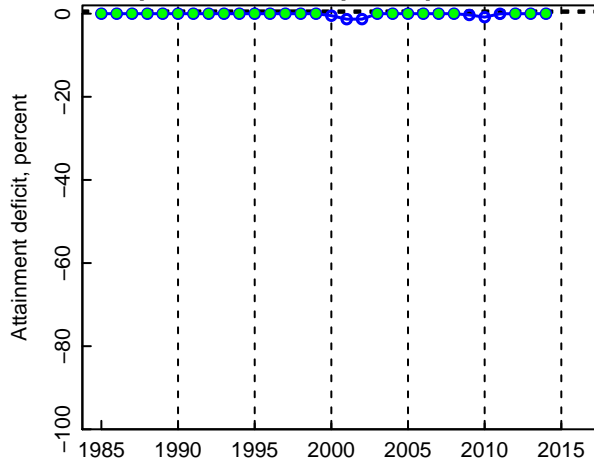**MATTF DO\_DW**

30-period trend slope: NA p-value: NA  
15-period trend slope: NA p-value: NA

**MATTF DO\_DC**

30-period trend slope: NA p-value: NA  
15-period trend slope: NA p-value: NA



MIDOH DO\_OW

30-period trend slope: 0 p-value: 0.1  
15-period trend slope: 0 p-value: NaN

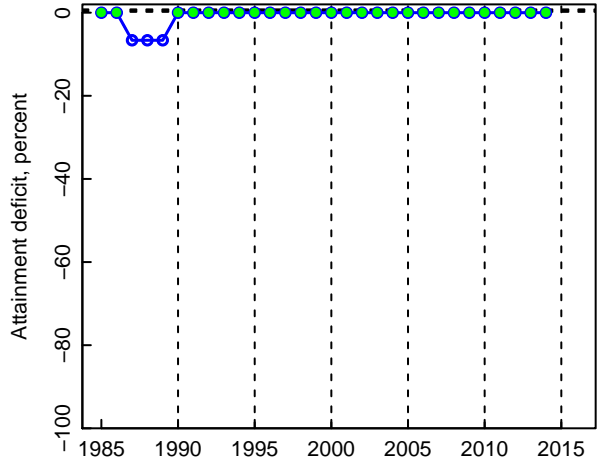

MIDOH DO\_DW

30-period trend slope: NA p-value: NA  
15-period trend slope: NA p-value: NA

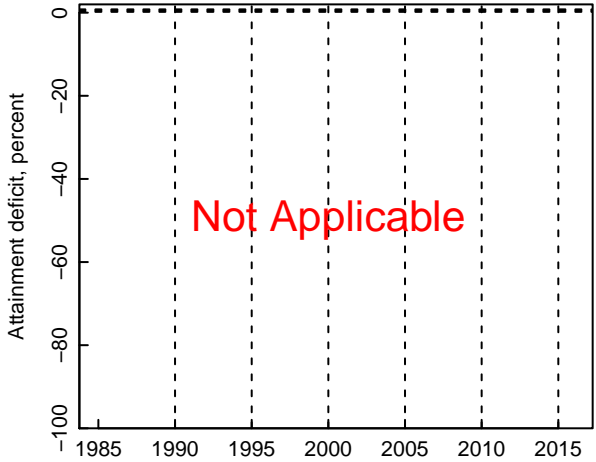

MIDOH DO\_DC

30-period trend slope: NA p-value: NA  
15-period trend slope: NA p-value: NA

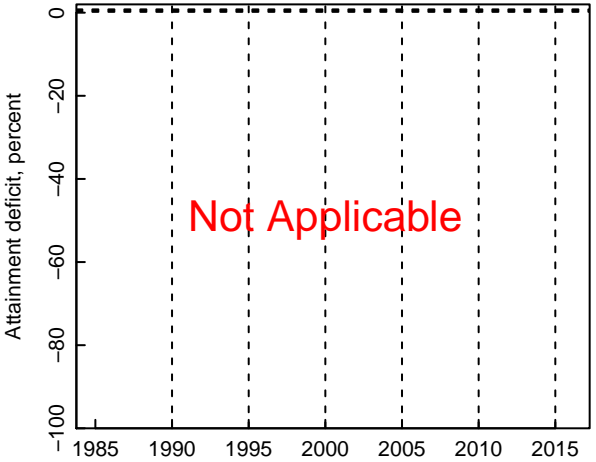

MOBPH DO\_OW

30-period trend slope: 0.0056 p-value: 0.15

15-period trend slope: 0 p-value: 0.5

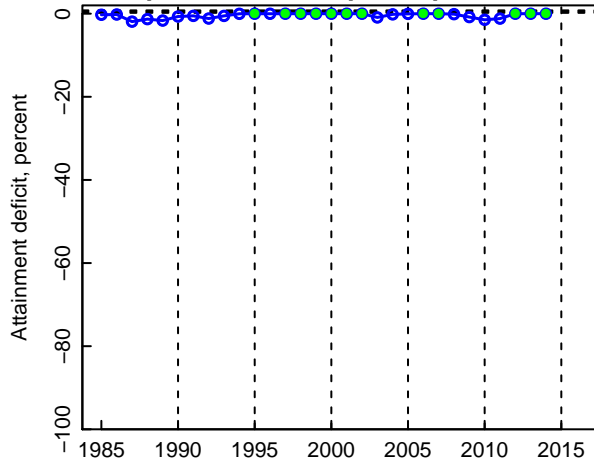

MOBPH DO\_DW

30-period trend slope: NA p-value: NA

15-period trend slope: NA p-value: NA



MOBPH DO\_DC

30-period trend slope: NA p-value: NA

15-period trend slope: NA p-value: NA





**MPNOH DO\_OW**

30-period trend slope:  $-0.19$  p-value: 0.3  
15-period trend slope:  $-0.39$  p-value: 0.17

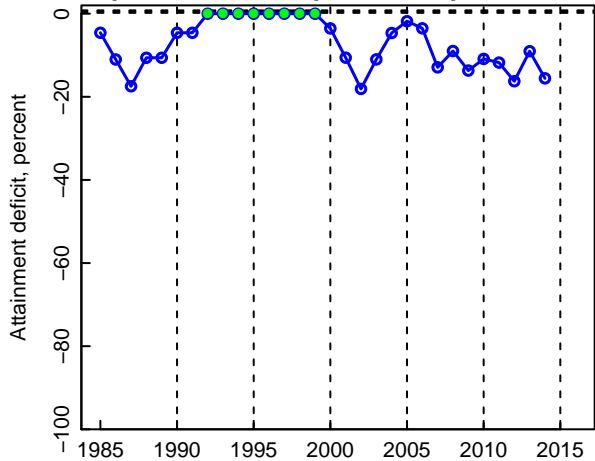**MPNOH DO\_DW**

30-period trend slope: NA p-value: NA  
15-period trend slope: NA p-value: NA

**MPNOH DO\_DC**

30-period trend slope: NA p-value: NA  
15-period trend slope: NA p-value: NA



MPNTF DO\_OW

30-period trend slope: 0 p-value: 0.068  
15-period trend slope: 0 p-value: NaN

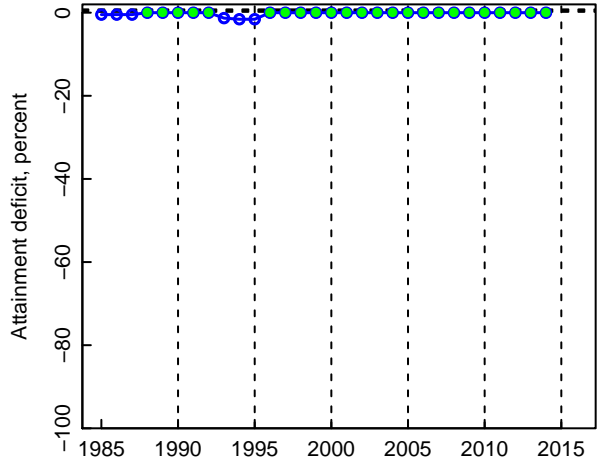

MPNTF DO\_DW

30-period trend slope: NA p-value: NA  
15-period trend slope: NA p-value: NA

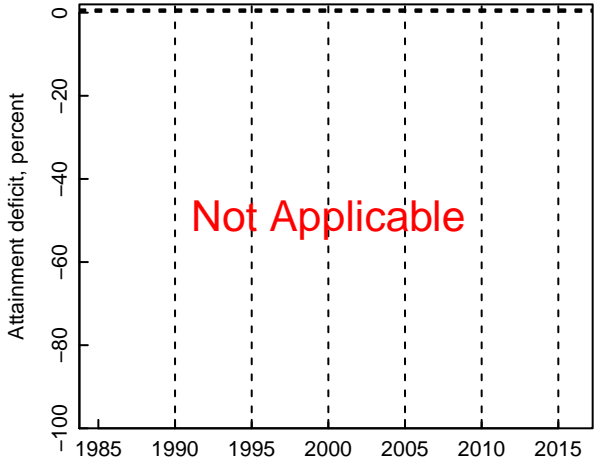

MPNTF DO\_DC

30-period trend slope: NA p-value: NA  
15-period trend slope: NA p-value: NA

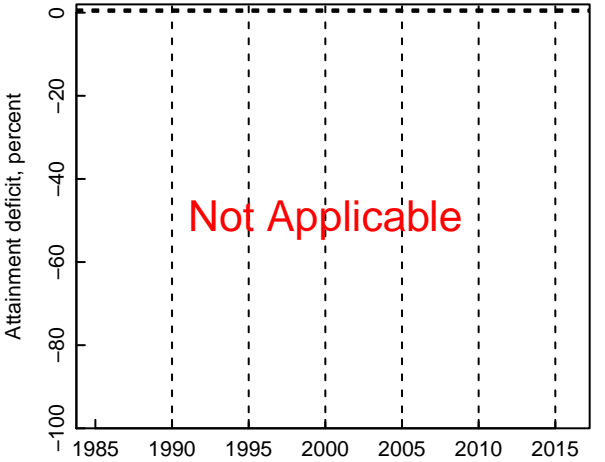

NANMH DO\_OW

30-period trend slope: 0 p-value: 0.1  
 15-period trend slope: 0 p-value: NaN

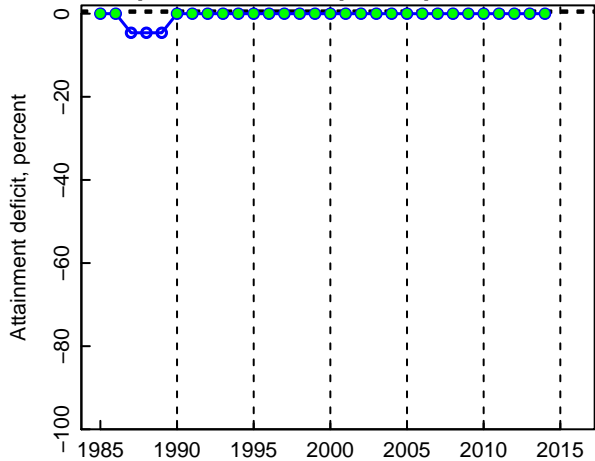

NANMH DO\_DW

30-period trend slope: NA p-value: NA  
 15-period trend slope: NA p-value: NA



NANMH DO\_DC

30-period trend slope: NA p-value: NA  
 15-period trend slope: NA p-value: NA



NANO<sub>H</sub> DO\_OW

30-period trend slope: -0.069 p-value: 0.45  
 15-period trend slope: 1.4 p-value: 2e-04

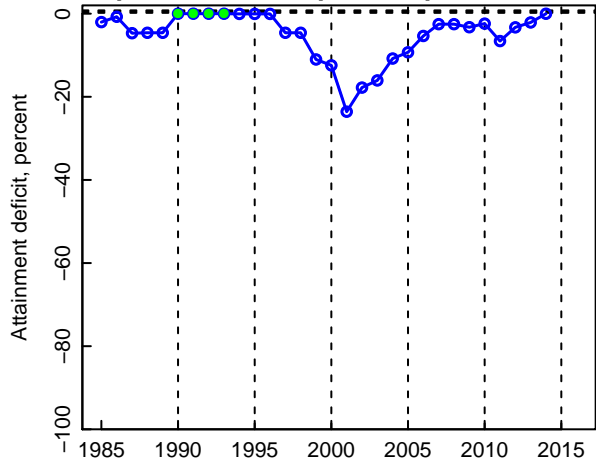

NANO<sub>H</sub> DO\_DW

30-period trend slope: NA p-value: NA  
 15-period trend slope: NA p-value: NA



NANO<sub>H</sub> DO\_DC

30-period trend slope: NA p-value: NA  
 15-period trend slope: NA p-value: NA



NANTF\_DE DO\_OW

30-period trend slope: -0.4 p-value: 0.33

15-period trend slope: 3.7 p-value: 9.1e-05

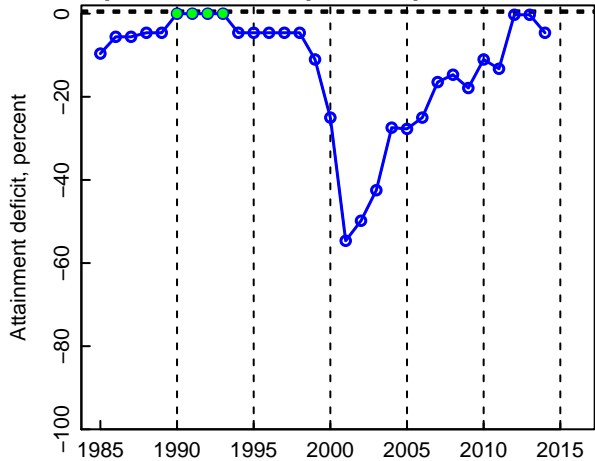

NANTF\_DE DO\_DW

30-period trend slope: NA p-value: NA

15-period trend slope: NA p-value: NA



NANTF\_DE DO\_DC

30-period trend slope: NA p-value: NA

15-period trend slope: NA p-value: NA



NANTF\_MD DO\_OW

30-period trend slope: -0.42 p-value: 0.35

15-period trend slope: 3.8 p-value: 3.9e-05

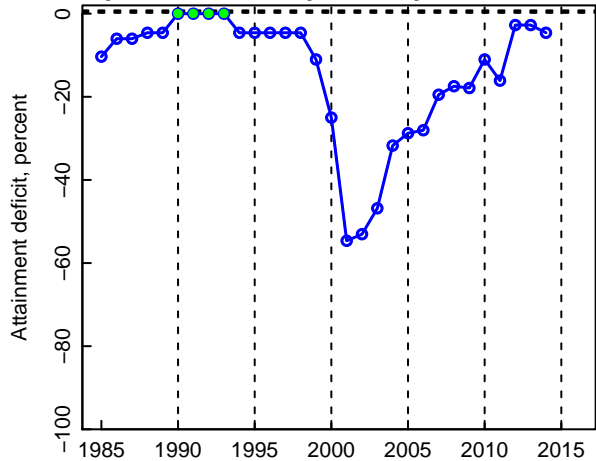

NANTF\_MD DO\_DW

30-period trend slope: NA p-value: NA

15-period trend slope: NA p-value: NA



NANTF\_MD DO\_DC

30-period trend slope: NA p-value: NA

15-period trend slope: NA p-value: NA



**NORTF DO\_OW**

30-period trend slope: 0 p-value: 0.7  
15-period trend slope: 0 p-value: 0.12

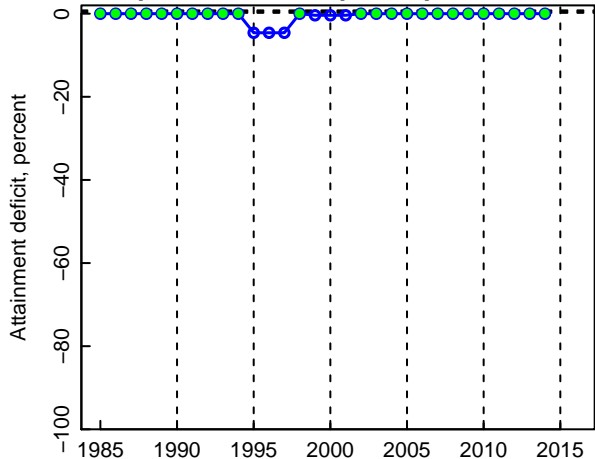

**NORTF DO\_DW**

30-period trend slope: NA p-value: NA  
15-period trend slope: NA p-value: NA

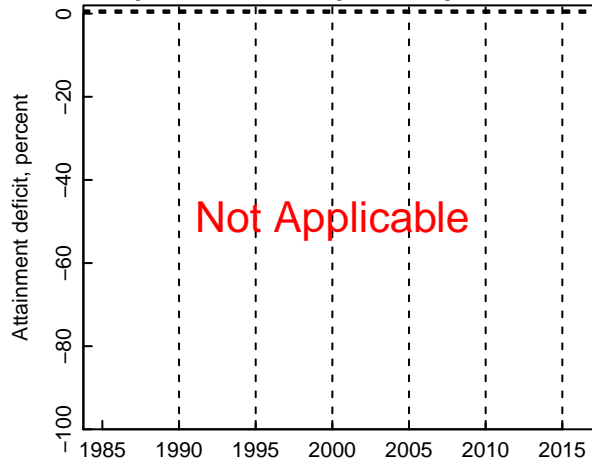

**NORTF DO\_DC**

30-period trend slope: NA p-value: NA  
15-period trend slope: NA p-value: NA

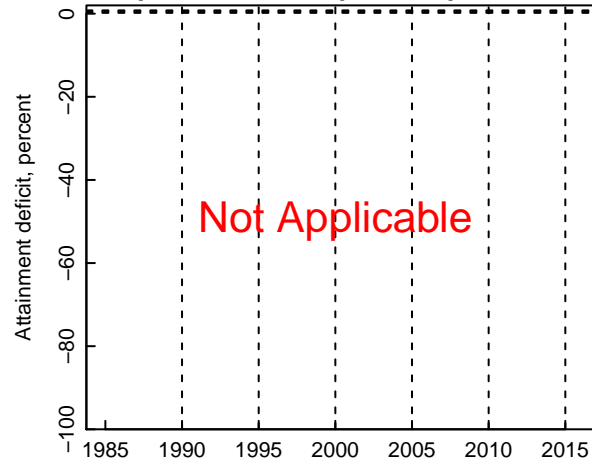

PATMH DO\_OW

30-period trend slope: 0 p-value: 0.017  
 15-period trend slope: -0.46 p-value: 1.8e-05

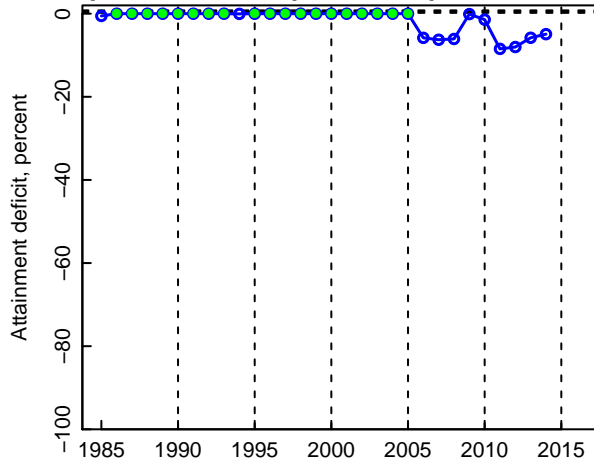

PATMH DO\_DW

30-period trend slope: 0.083 p-value: 0.51  
 15-period trend slope: 0.18 p-value: 0.78

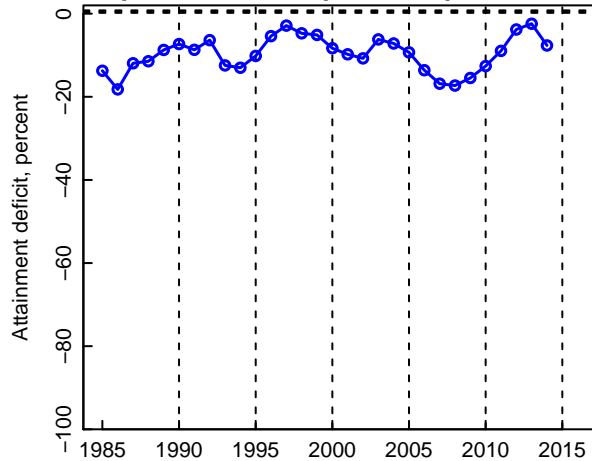

PATMH DO\_DC

30-period trend slope: -0.12 p-value: 0.75  
 15-period trend slope: -0.11 p-value: 0.89

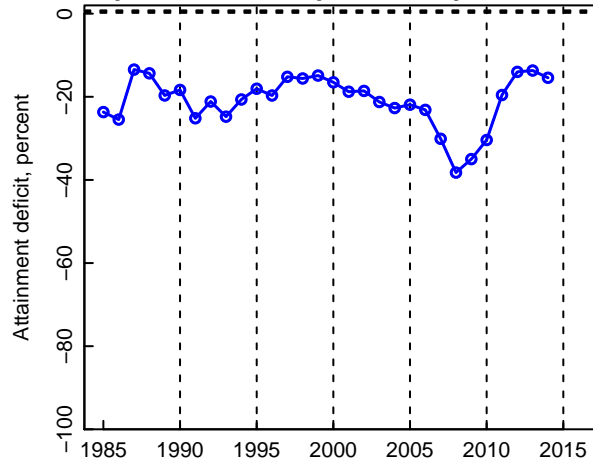



**PAXMH DO\_OW**

30-period trend slope: 0.28 p-value: 0.05  
15-period trend slope: 0.98 p-value: 1.1e-04

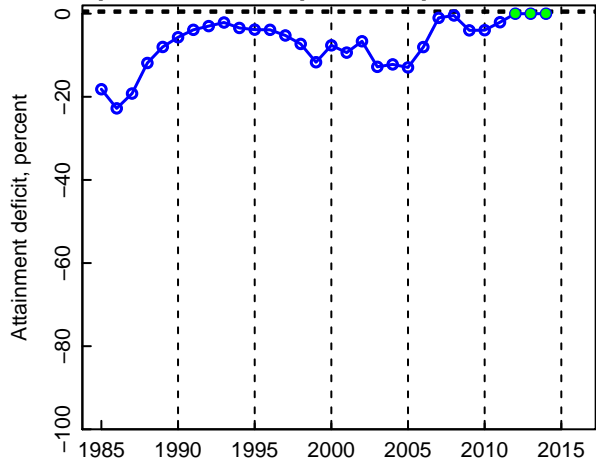**PAXMH DO\_DW**

30-period trend slope: -0.035 p-value: 0.72  
15-period trend slope: 0.74 p-value: 4e-05

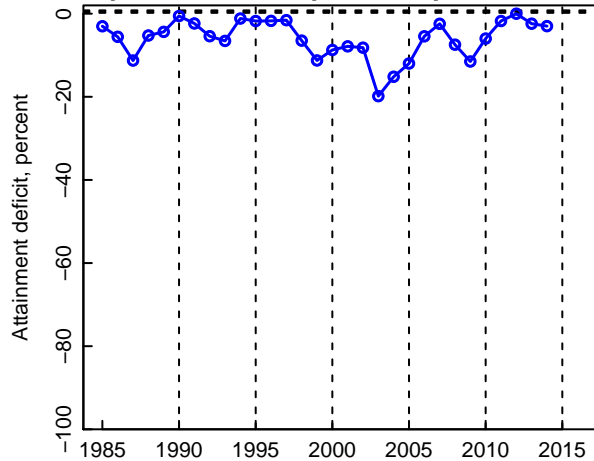**PAXMH DO\_DC**

30-period trend slope: NA p-value: NA  
15-period trend slope: NA p-value: NA



### PAXOH DO\_OW

30-period trend slope: -0.5 p-value: 0.086

15-period trend slope: 2 p-value: 0.2

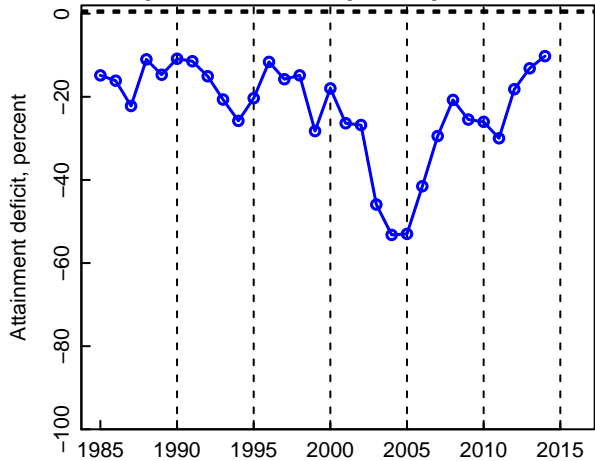

### PAXOH DO\_DW

30-period trend slope: NA p-value: NA

15-period trend slope: NA p-value: NA



### PAXOH DO\_DC

30-period trend slope: NA p-value: NA

15-period trend slope: NA p-value: NA



**PAXTF DO\_OW**

30-period trend slope:  $-0.54$  p-value:  $0.0001$   
15-period trend slope:  $-0.89$  p-value:  $0.0041$

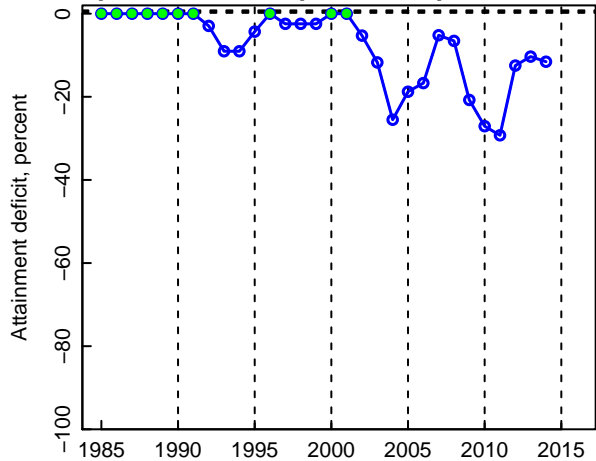**PAXTF DO\_DW**

30-period trend slope: NA p-value: NA  
15-period trend slope: NA p-value: NA

**PAXTF DO\_DC**

30-period trend slope: NA p-value: NA  
15-period trend slope: NA p-value: NA



PIAMH DO\_OW

30-period trend slope: 0 p-value: 0.11  
 15-period trend slope: 0 p-value: NaN

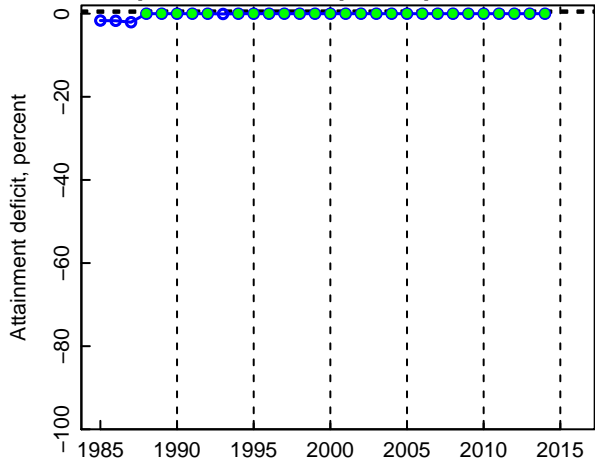

PIAMH DO\_DW

30-period trend slope: NA p-value: NA  
 15-period trend slope: NA p-value: NA



PIAMH DO\_DC

30-period trend slope: NA p-value: NA  
 15-period trend slope: NA p-value: NA



PISTF DO\_OW

30-period trend slope: 0 p-value: 0.77

15-period trend slope: 0 p-value: 0.00068

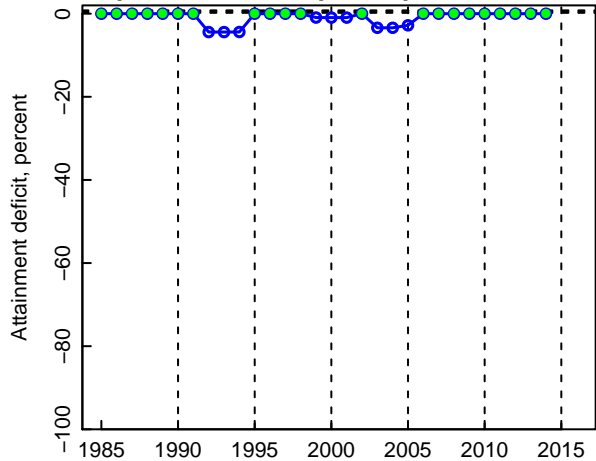

PISTF DO\_DW

30-period trend slope: NA p-value: NA

15-period trend slope: NA p-value: NA



PISTF DO\_DC

30-period trend slope: NA p-value: NA

15-period trend slope: NA p-value: NA



PMKOH DO\_OW

30-period trend slope: 0.028 p-value: 0.29  
15-period trend slope: -0.048 p-value: 0.65

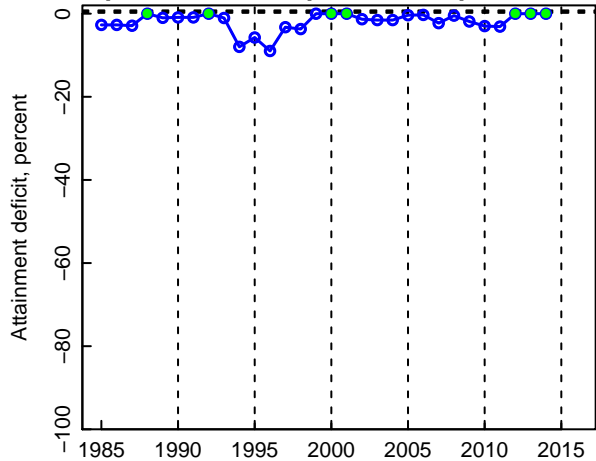

PMKOH DO\_DW

30-period trend slope: NA p-value: NA  
15-period trend slope: NA p-value: NA



PMKOH DO\_DC

30-period trend slope: NA p-value: NA  
15-period trend slope: NA p-value: NA



**PMKTF DO\_OW**

30-period trend slope: 0 p-value: 0.018

15-period trend slope: 0 p-value: NaN

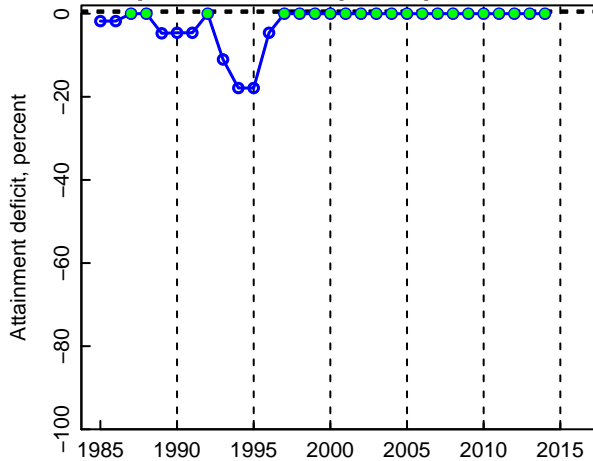**PMKTF DO\_DW**

30-period trend slope: NA p-value: NA

15-period trend slope: NA p-value: NA



Not Applicable

**PMKTF DO\_DC**

30-period trend slope: NA p-value: NA

15-period trend slope: NA p-value: NA



Not Applicable

POCMH\_MD DO\_OW

30-period trend slope: 0 p-value: NaN

15-period trend slope: 0 p-value: NaN



POCMH\_MD DO\_DW

30-period trend slope: NA p-value: NA

15-period trend slope: NA p-value: NA



POCMH\_MD DO\_DC

30-period trend slope: NA p-value: NA

15-period trend slope: NA p-value: NA





POCMH\_VA DO\_OW

30-period trend slope: 0 p-value: NaN

15-period trend slope: 0 p-value: NaN



POCMH\_VA DO\_DW

30-period trend slope: NA p-value: NA

15-period trend slope: NA p-value: NA



POCMH\_VA DO\_DC

30-period trend slope: NA p-value: NA

15-period trend slope: NA p-value: NA



POCOH\_MD DO\_OW

30-period trend slope: 0.86 p-value: 0.16  
15-period trend slope: 2.3 p-value: 0.12

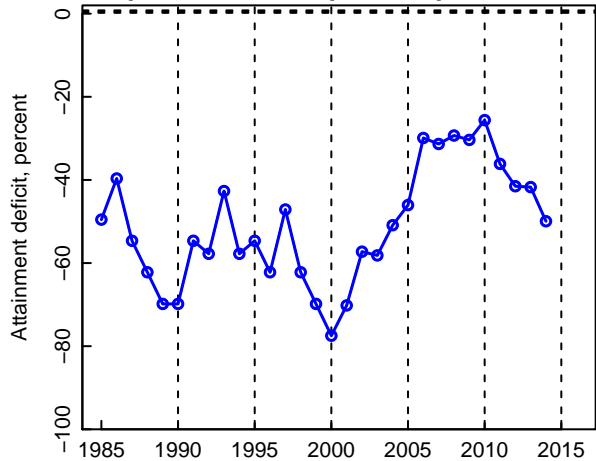

POCOH\_MD DO\_DW

30-period trend slope: NA p-value: NA  
15-period trend slope: NA p-value: NA



POCOH\_MD DO\_DC

30-period trend slope: NA p-value: NA  
15-period trend slope: NA p-value: NA



POCOH\_VA DO\_OW

30-period trend slope: 2 p-value: 0.054

15-period trend slope: 3.9 p-value: 0.049

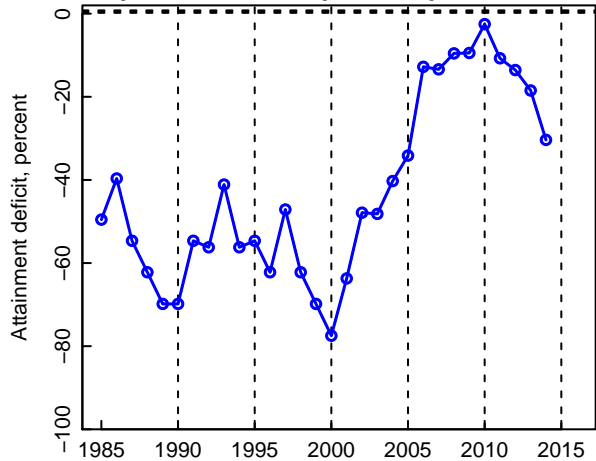

POCOH\_VA DO\_DW

30-period trend slope: NA p-value: NA

15-period trend slope: NA p-value: NA



POCOH\_VA DO\_DC

30-period trend slope: NA p-value: NA

15-period trend slope: NA p-value: NA



**POCTF DO\_OW**

30-period trend slope: -1.1 p-value: 2.4e-04  
 15-period trend slope: 0 p-value: 0.94

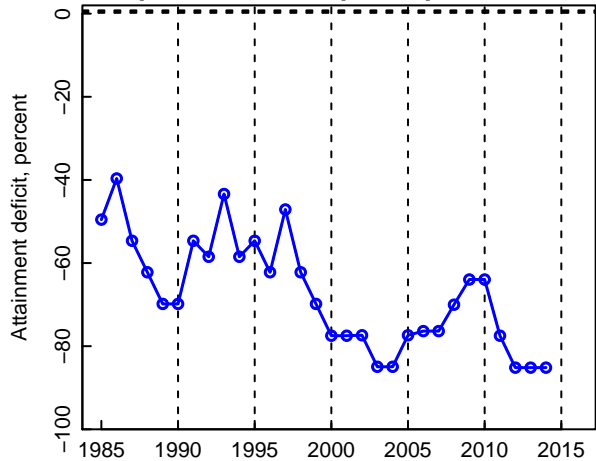

**POCTF DO\_DW**

30-period trend slope: NA p-value: NA  
 15-period trend slope: NA p-value: NA



**POCTF DO\_DC**

30-period trend slope: NA p-value: NA  
 15-period trend slope: NA p-value: NA



**POTMH\_MD DO\_OW****30-period trend slope: 0 p-value: 0.085****15-period trend slope: 0 p-value: 0.44**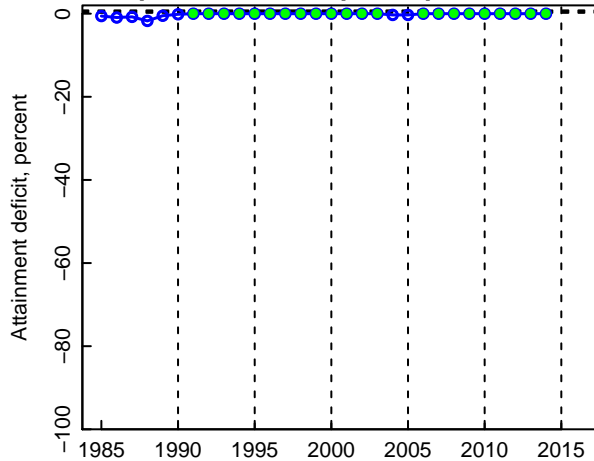**POTMH\_MD DO\_DW****30-period trend slope: -0.19 p-value: 0.3****15-period trend slope: 0.34 p-value: 0.43**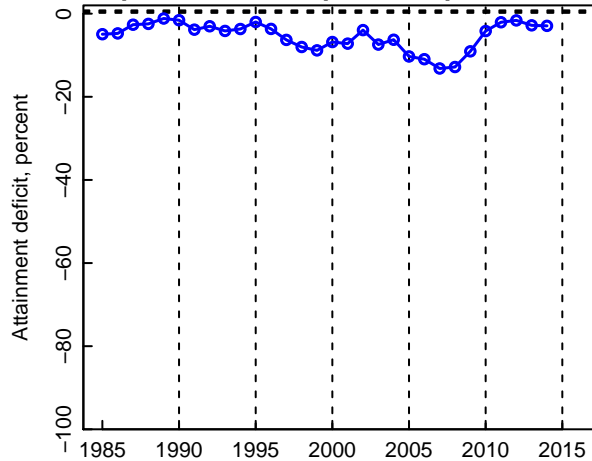**POTMH\_MD DO\_DC****30-period trend slope: -0.24 p-value: 0.26****15-period trend slope: 0.38 p-value: 0.62**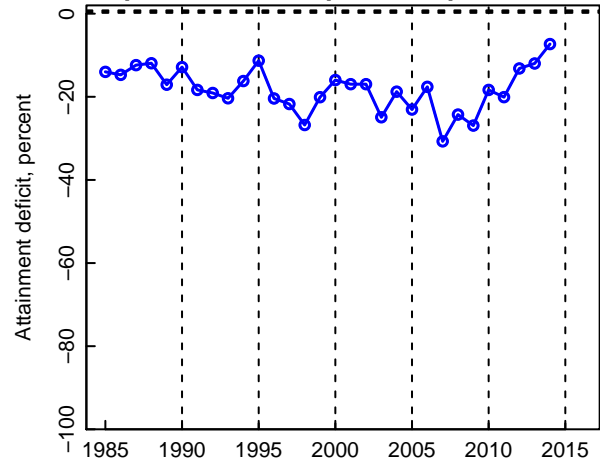

**POTMH\_VA DO\_OW**

30-period trend slope: -0.19 p-value: 0.017  
15-period trend slope: -0.19 p-value: 0.017

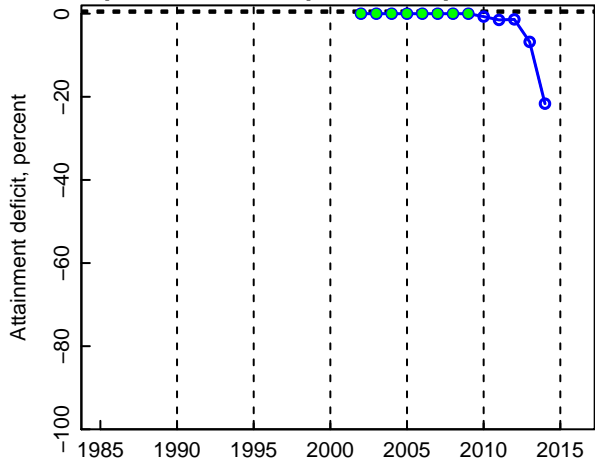**POTMH\_VA DO\_DW**

30-period trend slope: 0 p-value: 0.1  
15-period trend slope: 0 p-value: 0.1

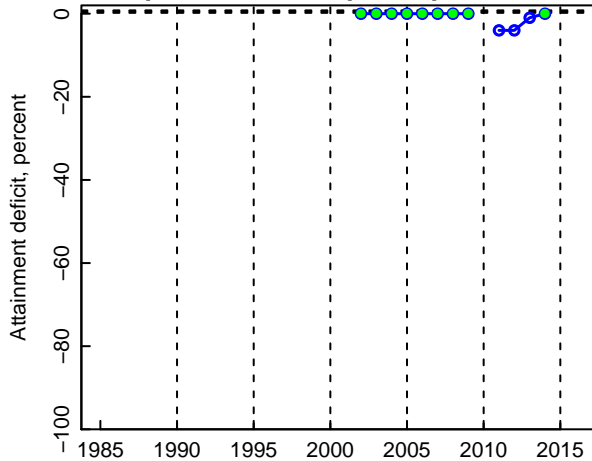**POTMH\_VA DO\_DC**

30-period trend slope: NA p-value: NA  
15-period trend slope: NA p-value: NA

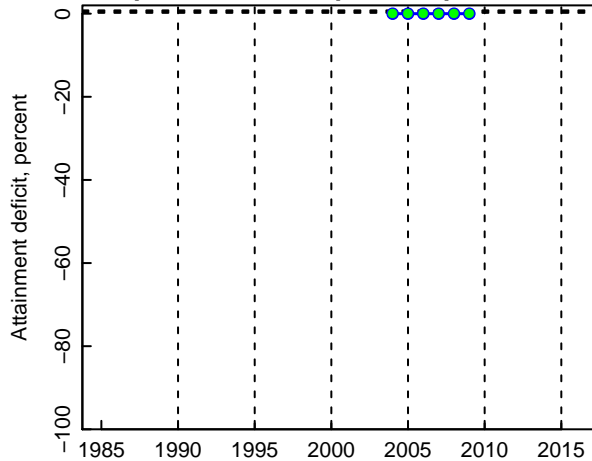

POTOH\_VA DO\_OW

30-period trend slope: 0 p-value: 0.35

15-period trend slope: 0 p-value: 0.35

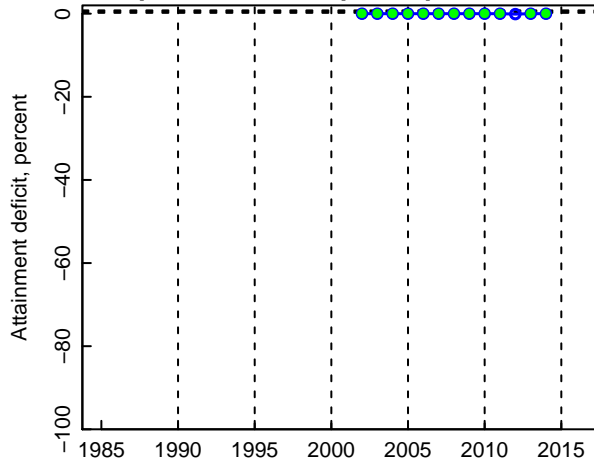

POTOH\_VA DO\_DW

30-period trend slope: NA p-value: NA

15-period trend slope: NA p-value: NA



POTOH\_VA DO\_DC

30-period trend slope: NA p-value: NA

15-period trend slope: NA p-value: NA



POTOH1\_MD DO\_OW

30-period trend slope: 0.052 p-value: 0.15  
15-period trend slope: 0.087 p-value: 0.009

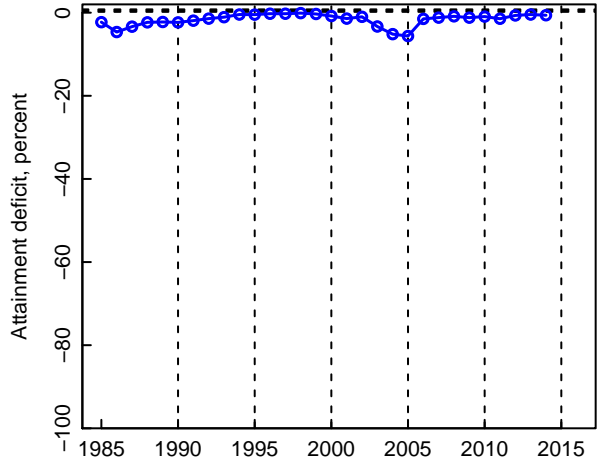

POTOH1\_MD DO\_DW

30-period trend slope: NA p-value: NA  
15-period trend slope: NA p-value: NA



POTOH1\_MD DO\_DC

30-period trend slope: NA p-value: NA  
15-period trend slope: NA p-value: NA

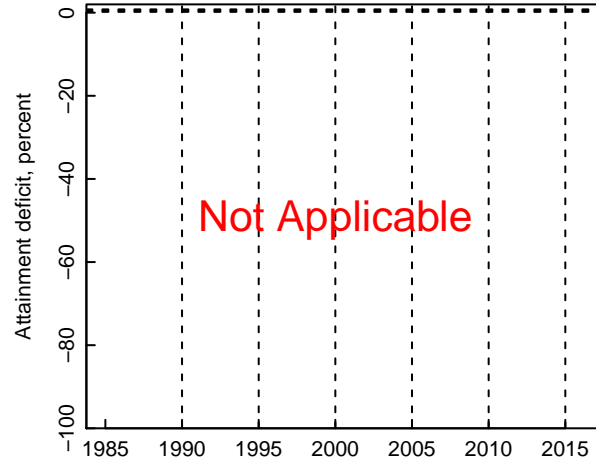



POTOH2\_MD DO\_OW

30-period trend slope: NA p-value: NA  
15-period trend slope: NA p-value: NA

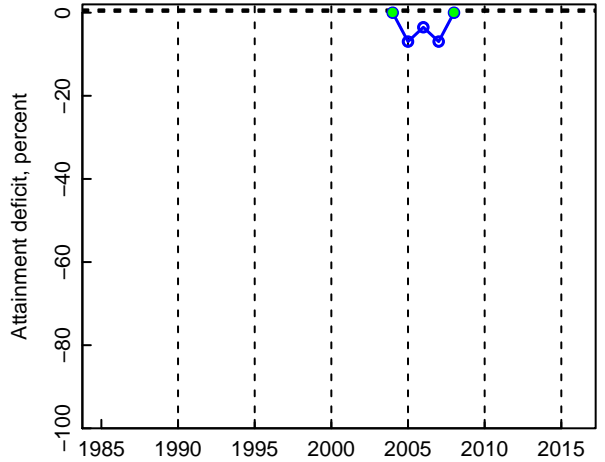

POTOH2\_MD DO\_DW

30-period trend slope: NA p-value: NA  
15-period trend slope: NA p-value: NA

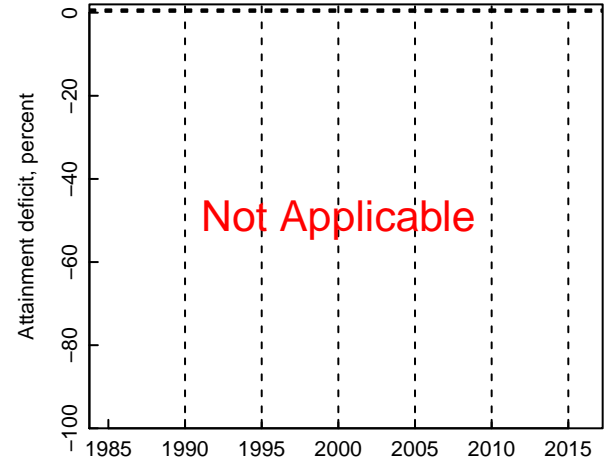

POTOH2\_MD DO\_DC

30-period trend slope: NA p-value: NA  
15-period trend slope: NA p-value: NA

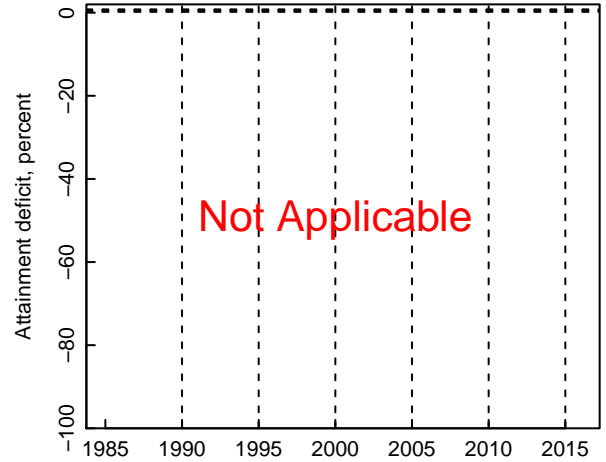

POTOH3\_MD DO\_OW

30-period trend slope: NA p-value: NA  
15-period trend slope: NA p-value: NA

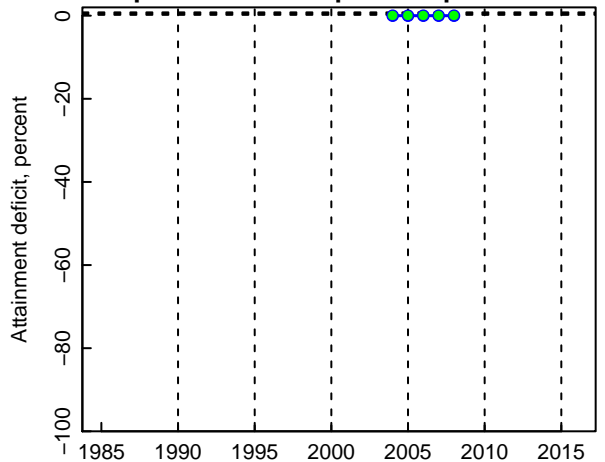

POTOH3\_MD DO\_DW

30-period trend slope: NA p-value: NA  
15-period trend slope: NA p-value: NA

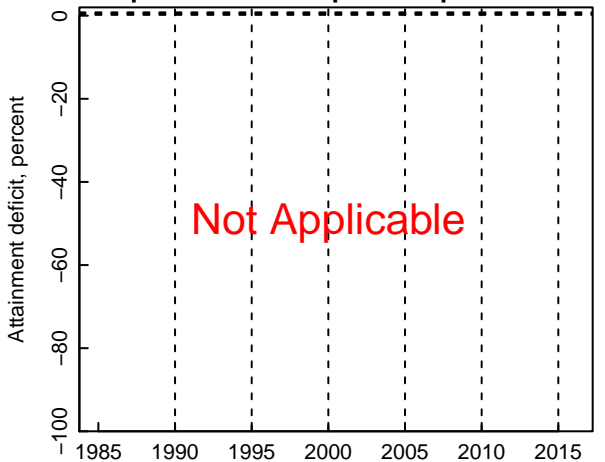

POTOH3\_MD DO\_DC

30-period trend slope: NA p-value: NA  
15-period trend slope: NA p-value: NA

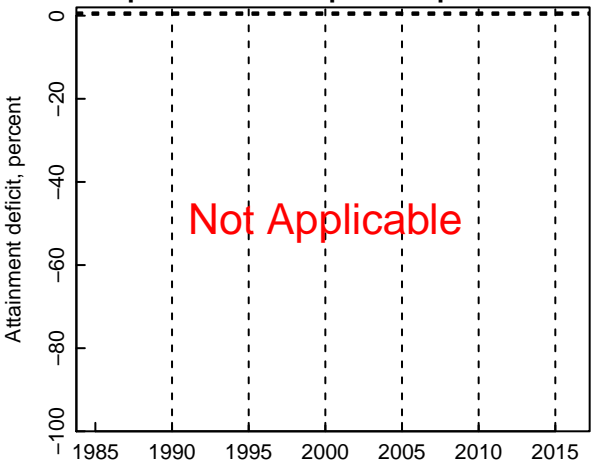

POTTF\_DC DO\_OW

30-period trend slope: 0.008 p-value: 0.083  
15-period trend slope: 0.00015 p-value: 0.000

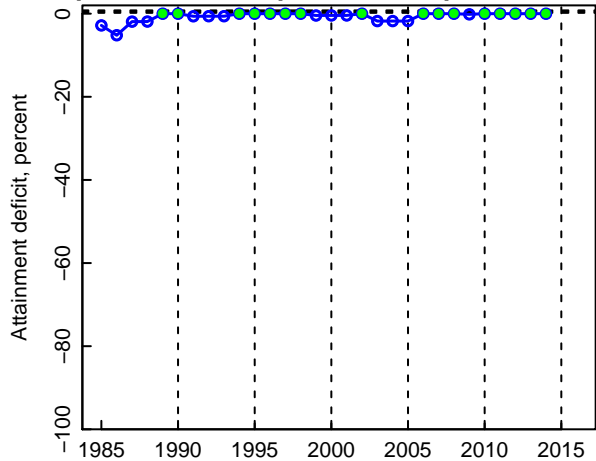

POTTF\_DC DO\_DW

30-period trend slope: NA p-value: NA  
15-period trend slope: NA p-value: NA



POTTF\_DC DO\_DC

30-period trend slope: NA p-value: NA  
15-period trend slope: NA p-value: NA



POTTF\_MD DO\_OW

30-period trend slope: 0 p-value: 0.44  
15-period trend slope: 0 p-value: 0.073

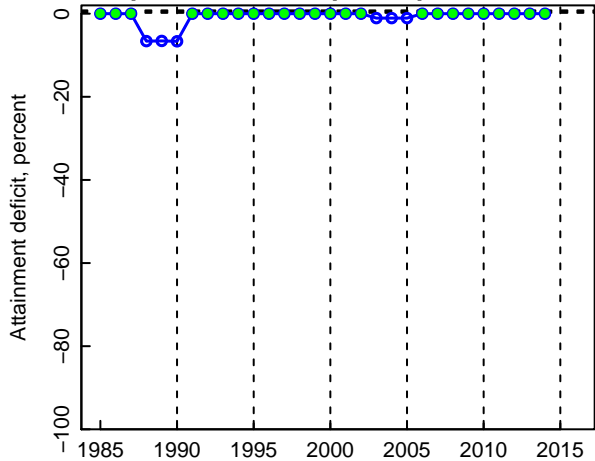

POTTF\_MD DO\_DW

30-period trend slope: NA p-value: NA  
15-period trend slope: NA p-value: NA



POTTF\_MD DO\_DC

30-period trend slope: NA p-value: NA  
15-period trend slope: NA p-value: NA



POTTF\_VA DO\_OW

30-period trend slope: -0.34 p-value: 0.014

15-period trend slope: -0.34 p-value: 0.014

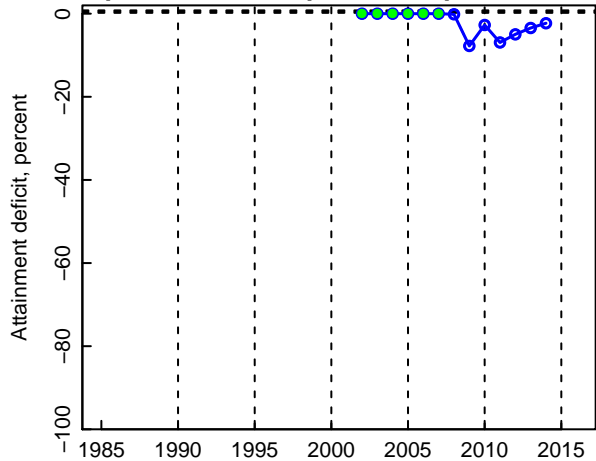

POTTF\_VA DO\_DW

30-period trend slope: NA p-value: NA

15-period trend slope: NA p-value: NA



POTTF\_VA DO\_DC

30-period trend slope: NA p-value: NA

15-period trend slope: NA p-value: NA



RHDMH DO\_OW

30-period trend slope: 0 p-value: 0.97

15-period trend slope: 0.55 p-value: 0.018

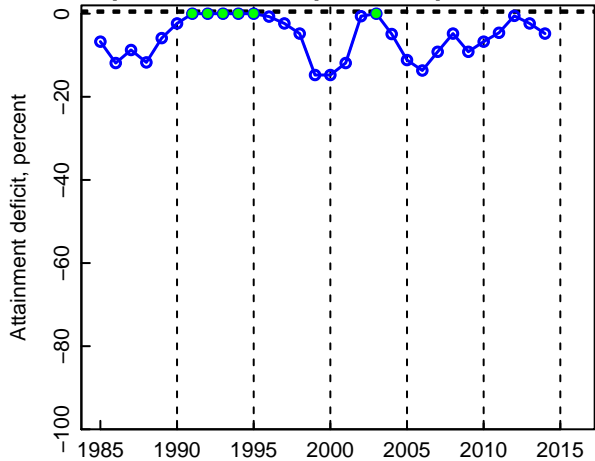

RHDMH DO\_DW

30-period trend slope: NA p-value: NA

15-period trend slope: NA p-value: NA



RHDMH DO\_DC

30-period trend slope: NA p-value: NA

15-period trend slope: NA p-value: NA



**RPPMH DO\_OW**

30-period trend slope: 0 p-value: 0.27  
15-period trend slope: 0 p-value: 0.31

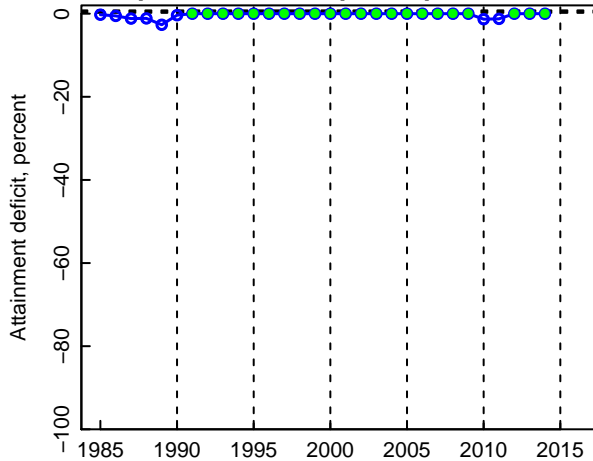**RPPMH DO\_DW**

30-period trend slope: 0.1 p-value: 0.038  
15-period trend slope: 0.24 p-value: 0.015

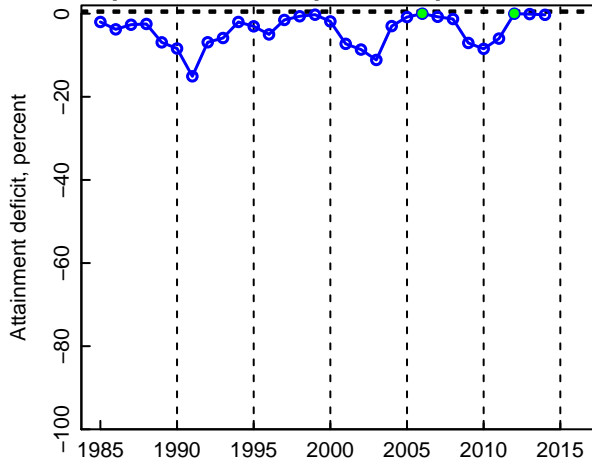**RPPMH DO\_DC**

30-period trend slope: 0.15 p-value: 0.33  
15-period trend slope: -1.2 p-value: 0.029

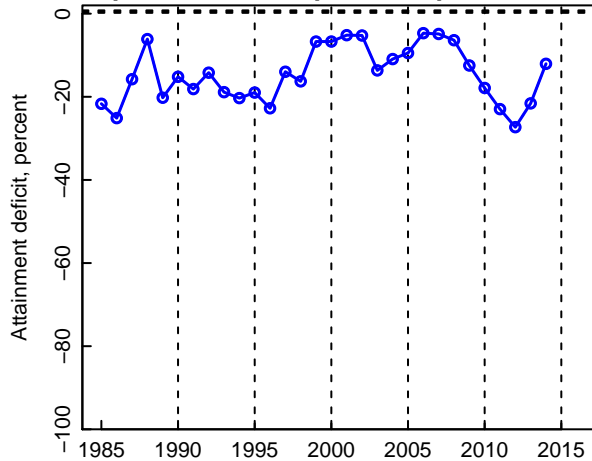

RPPOH DO\_OW

30-period trend slope: 0 p-value: 0.03  
15-period trend slope: 0 p-value: 0.00091

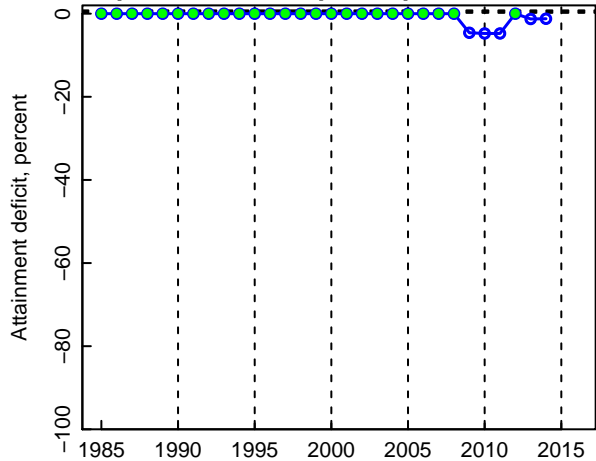

RPPOH DO\_DW

30-period trend slope: NA p-value: NA  
15-period trend slope: NA p-value: NA



Not Applicable

RPPOH DO\_DC

30-period trend slope: NA p-value: NA  
15-period trend slope: NA p-value: NA



Not Applicable



RPPTF DO\_OW

30-period trend slope: 0 p-value: 0.062

15-period trend slope: 0 p-value: 0.12

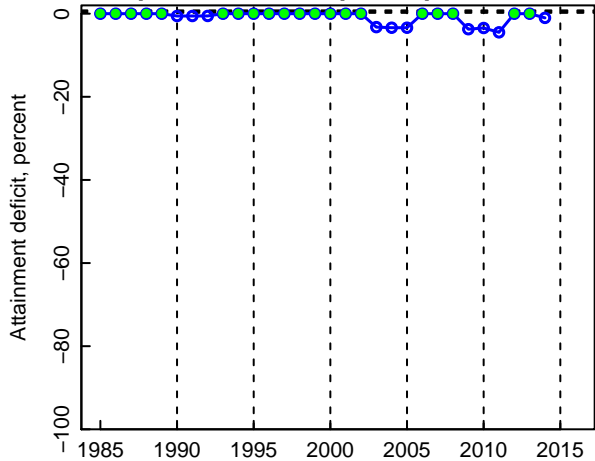

RPPTF DO\_DW

30-period trend slope: NA p-value: NA

15-period trend slope: NA p-value: NA



RPPTF DO\_DC

30-period trend slope: NA p-value: NA

15-period trend slope: NA p-value: NA



**SASOH DO\_OW****30-period trend slope: 0.39 p-value: 0.0035****15-period trend slope: 0 p-value: 0.69**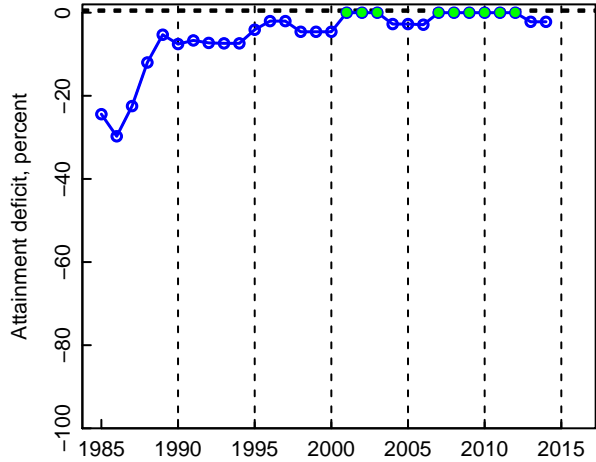**SASOH DO\_DW****30-period trend slope: NA p-value: NA****15-period trend slope: NA p-value: NA****SASOH DO\_DC****30-period trend slope: NA p-value: NA****15-period trend slope: NA p-value: NA**

**SBEMH DO\_OW****30-period trend slope: -0.044 p-value: 0.94****15-period trend slope: 0.37 p-value: 0.92**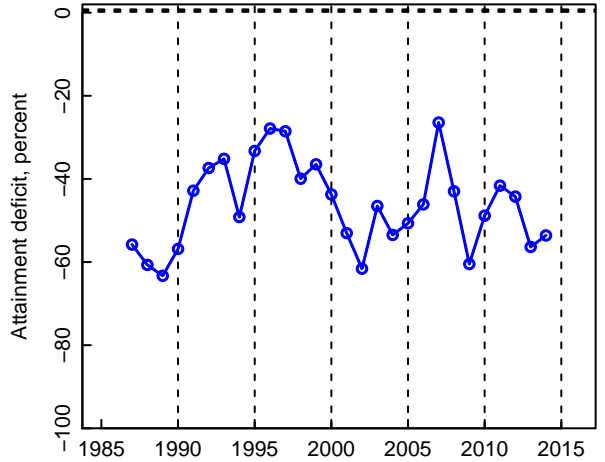**SBEMH DO\_DW****30-period trend slope: 0.29 p-value: 0.12****15-period trend slope: 0 p-value: 1**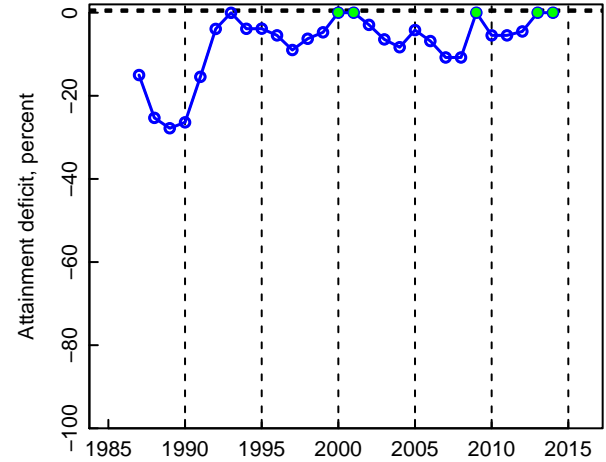**SBEMH DO\_DC****30-period trend slope: NA p-value: NA****15-period trend slope: NA p-value: NA**

**SEVMH DO\_OW**

30-period trend slope: 0 p-value: 0.62  
15-period trend slope: 0 p-value: 0.77

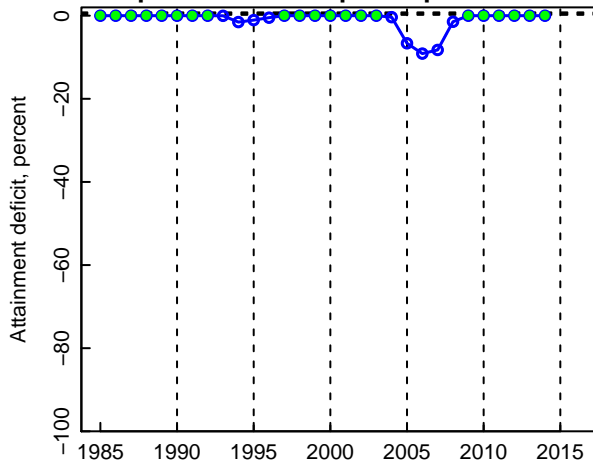**SEVMH DO\_DW**

30-period trend slope: -0.089 p-value: 0.72  
15-period trend slope: 0.94 p-value: 0.14

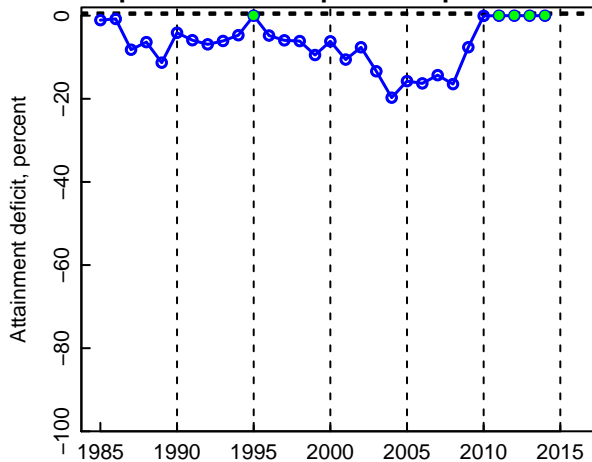**SEVMH DO\_DC**

30-period trend slope: NA p-value: NA  
15-period trend slope: NA p-value: NA



**SOU MH DO\_OW**

30-period trend slope: 0 p-value: 0.56

15-period trend slope: 0 p-value: 0.8

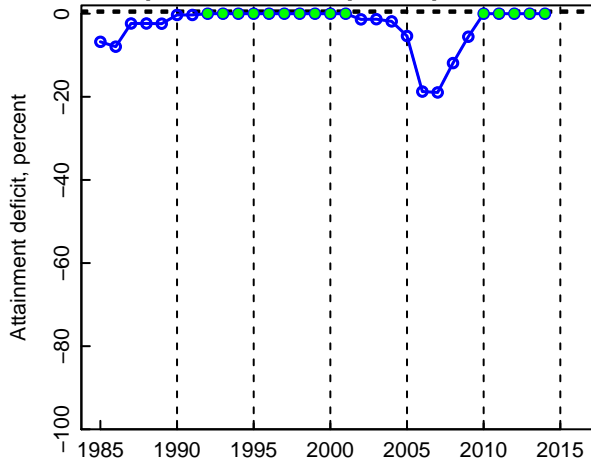**SOU MH DO\_DW**

30-period trend slope: 0.99 p-value: 0.051

15-period trend slope: 2.4 p-value: 0.0023

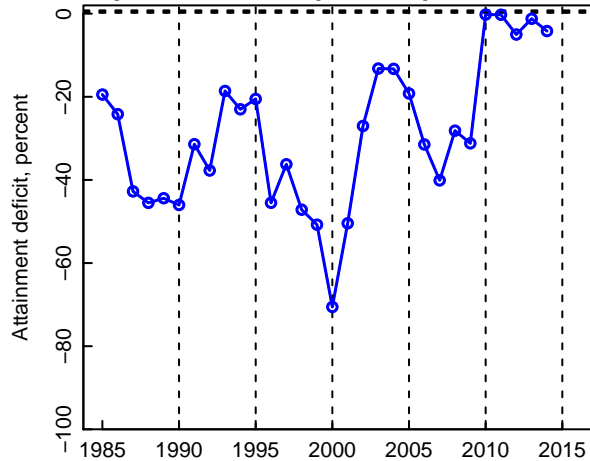**SOU MH DO\_DC**

30-period trend slope: NA p-value: NA

15-period trend slope: NA p-value: NA



TANMH\_MD DO\_OW

30-period trend slope: 0 p-value: 0.87

15-period trend slope: 0.0041 p-value: 0.37

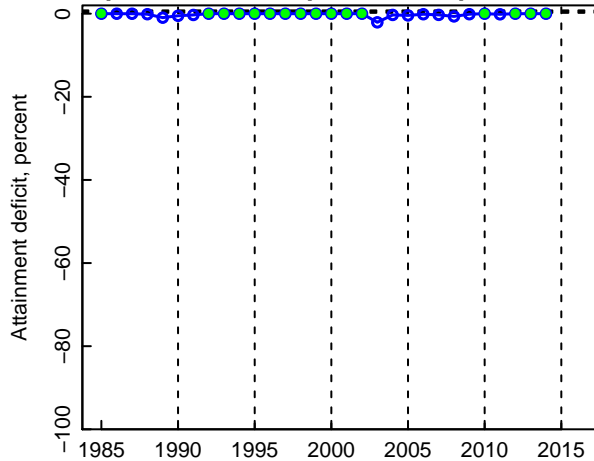

TANMH\_MD DO\_DW

30-period trend slope: NA p-value: NA

15-period trend slope: NA p-value: NA



TANMH\_MD DO\_DC

30-period trend slope: NA p-value: NA

15-period trend slope: NA p-value: NA



TANMH\_VA DO\_OW

30-period trend slope: 0.00089 p-value: 0.89

15-period trend slope: -0.015 p-value: 0.8

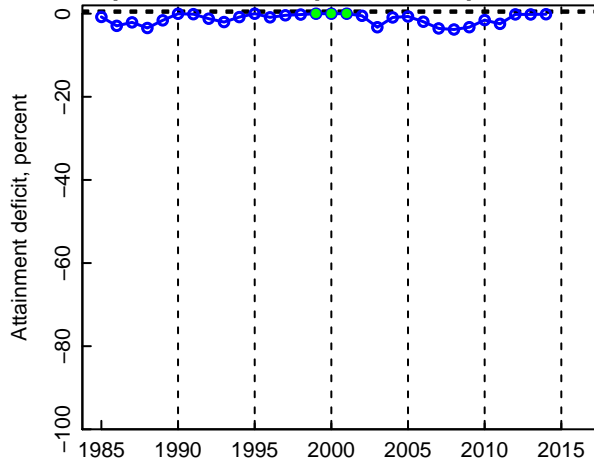

TANMH\_VA DO\_DW

30-period trend slope: NA p-value: NA

15-period trend slope: NA p-value: NA



TANMH\_VA DO\_DC

30-period trend slope: NA p-value: NA

15-period trend slope: NA p-value: NA



**WBEMH DO\_OW**

30-period trend slope:  $-0.15$  p-value: 0.9  
15-period trend slope:  $-0.34$  p-value: 0.69

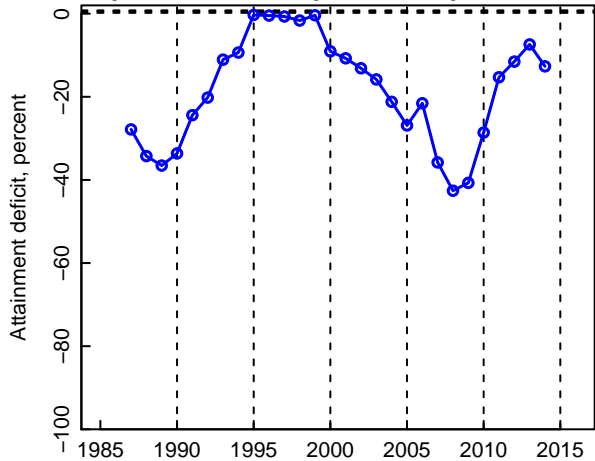**WBEMH DO\_DW**

30-period trend slope: NA p-value: NA  
15-period trend slope: NA p-value: NA

**WBEMH DO\_DC**

30-period trend slope: NA p-value: NA  
15-period trend slope: NA p-value: NA





WBRTF DO\_OW

30-period trend slope: 0 p-value: 0.48

15-period trend slope: -0.031 p-value: 0.06

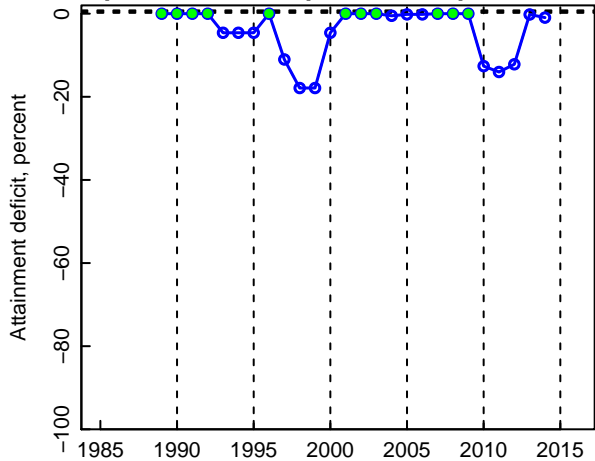

WBRTF DO\_DW

30-period trend slope: NA p-value: NA

15-period trend slope: NA p-value: NA



WBRTF DO\_DC

30-period trend slope: NA p-value: NA

15-period trend slope: NA p-value: NA



**WICMH DO\_OW**

30-period trend slope:  $-0.5$  p-value: 0.089  
15-period trend slope:  $-1.5$  p-value: 0.0006

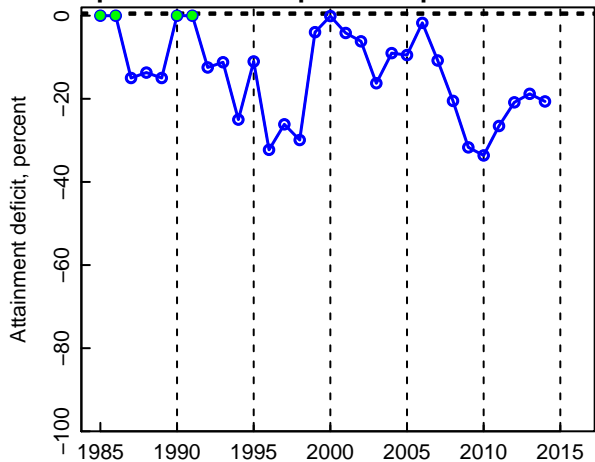**WICMH DO\_DW**

30-period trend slope: NA p-value: NA  
15-period trend slope: NA p-value: NA

**WICMH DO\_DC**

30-period trend slope: NA p-value: NA  
15-period trend slope: NA p-value: NA



### WSTMH DO\_OW

30-period trend slope: 0.16 p-value: 0.27  
15-period trend slope: 0.97 p-value: 6.6e-04

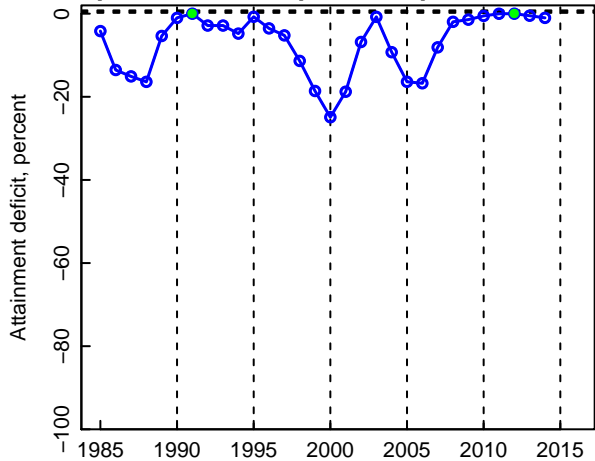

### WSTMH DO\_DW

30-period trend slope: NA p-value: NA  
15-period trend slope: NA p-value: NA



### WSTMH DO\_DC

30-period trend slope: NA p-value: NA  
15-period trend slope: NA p-value: NA



YRKMH DO\_OW

30-period trend slope: 0.19 p-value: NaN  
15-period trend slope: 0.22 p-value: 0.55

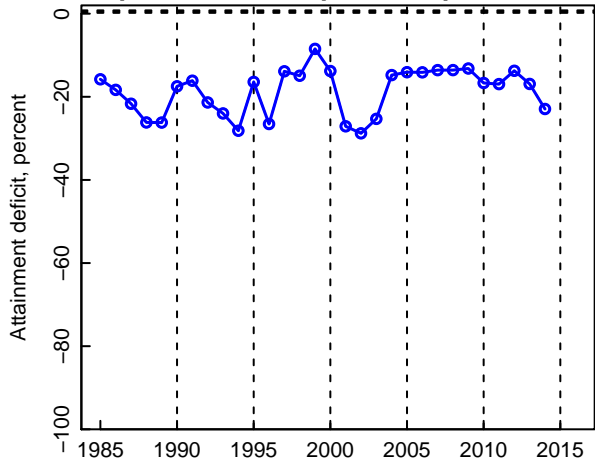

YRKMH DO\_DW

30-period trend slope: NA p-value: NA  
15-period trend slope: NA p-value: NA



YRKMH DO\_DC

30-period trend slope: NA p-value: NA  
15-period trend slope: NA p-value: NA



YRKPH DO\_OW

30-period trend slope: 0.26 p-value: 0.074  
15-period trend slope: 0.27 p-value: 0.51

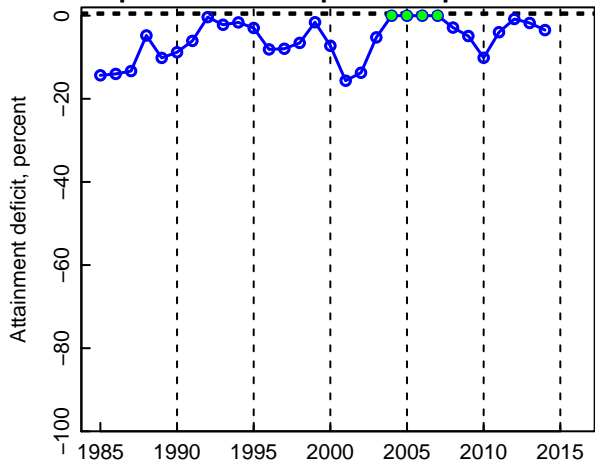

YRKPH DO\_DW

30-period trend slope: 0 p-value: 0.43  
15-period trend slope: 0 p-value: 0.28

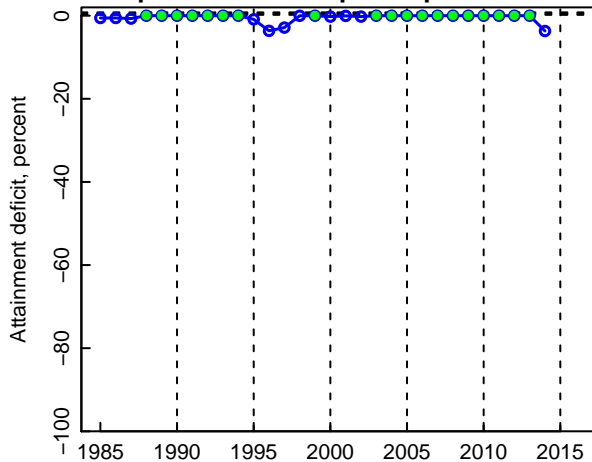

YRKPH DO\_DC

30-period trend slope: NA p-value: NA  
15-period trend slope: NA p-value: NA



Supplement: NIHMS1042326-supplement-Supplementary_C.pdf [file NIHMS1042326-supplement-Supplementary_C.pdf]
